1 **Field trial of a probiotic bacteria and a chemical, chitosan, to protect bats from white-nose**  
2 **syndrome**

3

4 Joseph R. Hoyt<sup>1,2,\*</sup>, Kate E. Langwig<sup>2</sup>, J. Paul White<sup>3</sup>, Heather M. Kaarakka<sup>3</sup>, Jennifer A.

5 Redell<sup>3</sup>, Katy L. Parise<sup>4,5</sup>, Winifred F. Frick<sup>1,6</sup>, Jeffrey T. Foster<sup>4,5</sup>, A. Marm Kilpatrick<sup>1,\*</sup>

6 *<sup>1</sup>Dept. Ecology and Evolutionary Biology, University of California, Santa Cruz, 95064, USA*

7 *<sup>2</sup>Dept. Biological Sciences, Virginia Tech, Blacksburg, VA, 24061, USA*

8 *<sup>3</sup>Wisconsin Department of Natural Resources, Bureau of Natural Heritage Conservation,*

9 *Madison, WI 53707, USA*

10 *<sup>4</sup>Department of Molecular, Cellular & Biomedical Science, University of New Hampshire,*

11 *Durham, NH 03824, USA*

12 *<sup>5</sup> Current Address: Center for Microbial Genetics and Genomics, Northern Arizona University,*

13 *Flagstaff, AZ 86011, USA*

14 *<sup>6</sup> Bat Conservation International, Austin, Texas 78716 USA*

15 *\*To whom correspondence should be addressed: [akilpatr@ucsc.edu](mailto:akilpatr@ucsc.edu) (A.M.K.) or*

16 *[hoytjosephr@gmail.com](mailto:hoytjosephr@gmail.com) (J.R.H)*

17

18

19

20

21 **Abstract**

22 Tools for reducing wildlife disease impacts are needed to conserve biodiversity. White-nose  
23 syndrome (WNS), caused by the fungus *Pseudogymnoascus destructans*, has caused widespread  
24 declines in North American bat populations and threatens several species with extinction. Few  
25 tools exist for managers to reduce WNS impacts. We tested the efficacy of two treatments, a  
26 probiotic bacterium, *Pseudomonas fluorescens*, and a chemical, chitosan, to reduce impacts of  
27 WNS in two simultaneous experiments conducted with caged and free-flying *Myotis lucifugus*  
28 bats at a mine in Wisconsin, USA. In the free-flying experiment, treatment with *P. fluorescens*  
29 increased apparent overwinter survival five-fold compared to the control group (from 8.4% to  
30 46.2%) by delaying emergence of bats from the site by 30 days. Apparent overwinter survival for  
31 free-flying chitosan-treated bats was 18.0%, which did not differ significantly from control bats.  
32 In the cage experiment, chitosan-treated bats had significantly higher survival until release on  
33 March 8 (53%) than control and *P. fluorescens*-treated bats (both 27%). However, these  
34 differences were likely due to within-cage disturbance and not reduced WNS impacts, because  
35 chitosan-treated bats actually had significantly higher UV-fluorescence (a measure of disease  
36 severity), and body mass, not infection intensity, predicted mortality. Further, few of the bats  
37 released from the cage experiment were detected emerging from the mine, indicating that the  
38 survival estimates at the time of release did not carryover to overwinter survival. These results  
39 suggest that treatment of bats may reduce WNS mortality, but additional measures are needed to  
40 prevent declines.

41

42

43

## 44 **Introduction**

45           White-nose syndrome (WNS), caused by the fungal pathogen, *Pseudogymnoascus*  
46 *destructans*, has caused widespread declines in bat populations throughout eastern and  
47 midwestern North America and threatens several species with extinction<sup>1-3</sup>. Three species  
48 (*Myotis lucifugus*, *Myotis sodalis*, and *Perimyotis subflavus*) have declined by 70-90% across  
49 multiple states, and a fourth species, *Myotis septentrionalis*, has been extirpated from most sites  
50 within three years of WNS detection<sup>2-4</sup>, in part, due to highly connected bat communities<sup>5</sup>.  
51 Although a few populations of *M. lucifugus* appear to be persisting at 10-25% of pre-WNS  
52 colony sizes, most colonies of this species have declined by >90%<sup>4,6</sup>. Several previously  
53 common species of hibernating bats are now relatively rare across large regions of the northeast  
54 USA<sup>2,4,7</sup>. Management interventions to reduce the impact of WNS on bat populations are needed  
55 to prevent further declines and restore bat populations.

56           Over the past seven years, several treatments for WNS have been explored and are in  
57 various stages of development, but none have been successfully tested in the field. Potential  
58 treatments to enable bats to survive hibernation have included volatile compounds released by  
59 bacteria, vaccination, chemical anti-fungals, and probiotic microbes (Table S1). The outcome of  
60 most lab and field trial studies is unclear, and there are currently no published reports of effective  
61 treatments from field trials (Table S1). Thus, at present, there are few tools for managers to  
62 reduce the impacts of WNS, and developing control options to reduce the severity of this disease  
63 among bats is a high priority<sup>8,9</sup>.

64           Our goal was to determine the efficacy of two treatments, *Pseudomonas fluorescens* and  
65 chitosan, in reducing WNS mortality in a field setting. *Pseudomonas fluorescens* is a ubiquitous  
66 bacterial species complex that is used as a fungal biocontrol agent in agriculture, and has been

67 tested as a treatment for chytridiomycosis in amphibians<sup>10-12</sup>. A previous study on multiple  
68 isolates of *P. fluorescens* isolated from different species of bats showed a range of anti-*P.*  
69 *destructans* properties *in vitro*<sup>13</sup>. One strain, isolated from a hibernating *Eptesicus fuscus* in  
70 Virginia, reduced the number of lesions, and increased survival of little brown bats when applied  
71 at the time of infection in a laboratory *in vivo* trial. Chitosan is a biopolymer polysaccharide  
72 extract from crustacean shells, has powerful antimicrobial and wound-healing properties, is  
73 biodegradable and non-toxic, and is a widely used anti-fungal in agriculture<sup>14</sup>. Chitosan has  
74 shown promise in inhibiting growth of *P. destructans* *in vitro* and in reducing mortality in *in vivo*  
75 lab experiments<sup>15</sup>.

76 We performed a field trial with two simultaneous experiments to balance the strengths  
77 and weaknesses of each approach. In the free-flying experiment, we treated bats, and attached an  
78 integrated passive transponder (PIT) tag to determine the date they emerged from the site. This  
79 experiment allowed bats to behave normally and roost freely throughout the site. However, there  
80 was additional uncertainty in determining the survival of free flying bats (e.g., bats could move  
81 to another site midwinter, die at the site and be eaten by predators or escape from the site by an  
82 unknown exit and not be detected by the PIT tag receiver). To balance these unknowns, we also  
83 performed an experiment with bats in cages. Placing bats in cages, as has been done in most *in*  
84 *vivo* experiments to date<sup>1,16-18</sup>, prevents bats from leaving the site and provides certainty about  
85 the survival of each bat. However, caging bats may alter their behavior (e.g. bats in the same  
86 cage may be disturbed when other bats arouse from hibernation).

87

88

89

## 90 **Results**

91           On the day of treatment, *P. destructans* infection prevalence, fungal loads and weights of  
92 bats were very similar among treatment groups in both experiments (Figure 1). This suggests that  
93 the randomization of bats to treatment groups and experiments did not result in any initial  
94 differences. Infection prevalence and fungal loads in November were very similar to loads  
95 observed on *M. lucifugus* at other sites where the fungus has been present for at least one  
96 previous winter<sup>19,20</sup>.

97

### 98 *Free-flying experiment*

99           Of the 44 bats we treated, only one bat (from the control group) appeared to have left the  
100 site due to the disturbance of being handled/treated (it was detected by the PIT tag reader on the  
101 day of treatment November 20, 2015 and never again). We detected 17 of the remaining 43 bats  
102 on the PIT tag reader between December 9, 2015 and April 17, 2016, with 6 of 7 (*P.*  
103 *fluorescens*), one of six (control), and two of four (chitosan) bats having left the site on or after  
104 the assumed overwinter survival date of March 7, 2016 (Figure 2). We found three additional bat  
105 carcasses inside the site (two control and one chitosan-treated bats). The fraction of bats known  
106 to be alive and detected by the PIT tag reader after March 7<sup>th</sup> (apparent overwinter survival) was  
107 46.2% (6/13) for *P. fluorescens*-treated bats, which was significantly higher than 8.5% (1/12) for  
108 control bats (Figure 3; the remaining 7 bats had lost their PIT tag; see Methods). Apparent  
109 overwinter survival was 18.0% (2/11) for chitosan-treated bats which was not significantly  
110 different from control bats (Figure 3).

111           The last date a bat was detected on the PIT tag reader was significantly later for *P.*  
112 *fluorescens*-treated bats than control bats, and overall, was earlier for bats with higher fungal

113 loads in November (Figure 4). The last detection dates for chitosan-treated bats were not  
114 significantly different than untreated controls (Figure 4). We did not compare differences in  
115 fungal loads or UV-fluorescence among treatment groups in March for bats in the free-flying  
116 experiment because only three bats were found and recaptured when we visited the site on March  
117 8. The remaining bats were likely in difficult-to-access portions of the mine.

#### 118 *Cage experiment*

119 On March 8<sup>th</sup>, 2016 four of 15 (26%) bats in the *P. fluorescens* cage, eight of 15 (53%) in  
120 the chitosan group, and four of 15 (26%) bats in the control group were still alive; the others  
121 were dead. The difference between chitosan and control groups in the fraction surviving until  
122 this date was not quite significant (Figure 5; logistic regression control vs. chitosan: coef = 1.145  
123  $\pm$  0.78,  $z = 1.47$ , one-tailed P-value = 0.07). However, when accounting for November body  
124 mass (which didn't differ between treatment groups, but was a significant predictor of survival;  
125 Figure 6c), the difference between chitosan and control groups was significant (logistic  
126 regression (reference group: control): Intercept:  $20.1 \pm 7.0$ ; Body mass:  $1.22 \pm 0.44$ ; P = 0.0054;  
127 chitosan coeff.  $1.72 \pm 0.90$ ; one-tailed P = 0.029; *P. fluorescence* coeff.  $-0.40 \pm 0.97$ ; P = 0.68).  
128 Unlike in the free-flying experiment, *P. destructans* fungal loads in November were not a  
129 significant predictor of survival (likelihood ratio test: P = 0.60). Most of the bats still alive in the  
130 cages were in very poor condition, and only three of the sixteen bats that survived to be released  
131 were subsequently detected by the PIT tag reader (two chitosan and one control bat) (Fig 5).

132 Secondary measures of disease severity from the cage experiment showed non-significant  
133 differences or patterns that contradicted the survival results. Fungal loads on bats in March were  
134 not significantly different among treatment groups (Figure 6a) and disease severity, as measured

135 by UV-fluorescence, was significantly higher for chitosan-treated bats than control bats (Figure  
136 6b).

137

## 138 **Discussion**

139 White-nose syndrome has caused widespread declines in multiple species of bats  
140 throughout eastern and midwestern North America, with declines in *M. lucifugus* colonies in the  
141 first year of WNS detection averaging 79% <sup>2,3</sup>. Survival of untreated bats in the free-flying  
142 experiment was similarly severe, with 91% (95% CI: 62-99%) of control bats likely dying over  
143 the winter. Treatment with the probiotic, *P. fluorescens*, increased apparent overwinter survival  
144 more than five-fold by extending the last date of detection by a month into early spring.  
145 Although this effect is substantial, over half of *P. fluorescens*-treated bats still likely died from  
146 WNS over the winter. In contrast, support for a protective effect of treatment with chitosan in  
147 reducing WNS mortality was mixed. Chitosan treatment increased survival in the cage  
148 experiment until March 8th, but few of these bats were subsequently detected by the PIT tag  
149 reader emerging onto the landscape, and disease severity, as measured by UV fluorescence, was  
150 significantly higher in chitosan-treated bats.

151 If treatment efficacy with *P. fluorescens* could be improved, *P. fluorescens* could provide  
152 a useful tool for conserving populations of *M. lucifugus* declining from WNS. One potentially  
153 important factor for future efforts with *P. fluorescens*, based on work in other systems, is  
154 whether the bacterial treatment persists or proliferates on the host species <sup>21</sup>. Increasing  
155 persistence and growth of *P. fluorescens* on bats by altering the dosage, or treatment frequency,  
156 or adding components to *P. fluorescens* solutions to encourage the formation of biofilms could  
157 help increase treatment efficacy <sup>21</sup>, assuming these alterations wouldn't have more deleterious

158 side effects. Previous *in vitro* studies suggested that many different strains of *P. fluorescens* have  
159 anti-*P. destructans* effects<sup>13</sup>. Future studies could examine alternate strains of *P. fluorescens*  
160 isolated from different populations (e.g., persisting populations of *M. lucifugus*;<sup>6</sup>) or other  
161 species of bats (the strain in this study was isolated from *E. fuscus*;<sup>13</sup>).

162 The effect of *P. fluorescens* or chitosan in reducing WNS impacts on other species also  
163 has yet to be tested. The most important species to protect from WNS is *M. septentrionalis*,  
164 which suffers nearly 100% mortality, and is on a pathway to extinction<sup>2</sup>. To date, no treatments  
165 have been developed for, or tested on, this species in either the lab or field. This is despite *M.*  
166 *septentrionalis* being the most heavily affected by WNS, with few hibernacula still containing  
167 this species in the US<sup>2,4,22</sup>.

168 In addition, our results offer potential insights for the experimental design of future field  
169 treatment trials aimed at reducing WNS mortality in hibernating bats. Researchers often have to  
170 choose between cage-artifacts and concerns about bats leaving the site following treatment and  
171 uncertainty in the survival outcome for some free-flying bats. Our data suggest that the free-  
172 flying experiment was a better experimental design, despite some challenges. Bats in this  
173 experiment were able to roost and behave normally, and only one of 44 bats left the site on the  
174 day of the experiment, suggesting that disturbance of handling and treatment are unlikely to  
175 compromise experiments if treatment can be done quickly (treatment, weighing and banding  
176 required ~1 hr. underground in this study). In addition, lower November fungal loads prolonged  
177 apparent survival, as would be expected if bats were dying from WNS<sup>22</sup>. The main challenge of  
178 the free-flying experiment was uncertainty associated with the fate of animals that were never  
179 detected by the PIT tag reader but not found dead within the site. However, as noted above, the  
180 extent of mortality in control bats inferred in the free-flying experiment was very similar to the



181 WNS declines observed in populations of *M. lucifugus* sites, supporting our assumption that  
182 most bats that were not detected by the PIT tag reader after March 7<sup>th</sup> did not survive the winter.  
183 One final challenge with mixed treatment free-flying experiments is that mixing of treatment  
184 groups (e.g., probiotic bacteria being transferred from treated to control bats) might occur  
185 through direct social interactions or indirect contact via the environment. The significant  
186 differences we observed between survival of bats in the *P. fluorescens* and control treatment  
187 groups suggest that direct or indirect contact was insufficient to transfer significant amounts of  
188 probiotic bacteria among bats.

189         The cage experiment suffered from several shortcomings that, in hindsight, indicate this  
190 was a problematic design. In our experiment each cage contained all the bats in each treatment,  
191 due to a limited availability of space for mounting cages to natural substrate in a predator-  
192 protected room, and to allow social bats to roost in groups. This resulted in pseudo-replication in  
193 this experiment, as in most previous laboratory studies on WNS<sup>1,16-18</sup>. This is particularly  
194 problematic for studies of WNS, because in small cages bats appear to disturb other bats when  
195 they arouse from hibernation<sup>23</sup>, and increased arousal frequency is thought to be a key  
196 mechanism of WNS mortality<sup>1,24,25</sup>. The fact that survival in the cage experiment was correlated  
197 with initial body mass, but not fungal loads, suggests that disturbance from other bats, or an  
198 inability to move to other locations within hibernacula, was more important than WNS in  
199 determining survival in this experiment. Together, these results indicate that the ideal design for  
200 a field trial (and for WNS challenge experiments more generally) is a free-flying experiment  
201 with mixed treatment groups in each site where bats have to pass through a PIT tag antenna to  
202 leave the site or are prevented from leaving the site (e.g. by sealing entrances, which may be very  
203 difficult). Sites where dead bats are relatively easy to find and are not eaten by predators (e.g.

204 mice, rats, and raccoons) would reduce uncertainty in survival outcomes. If an experiment  
205 requires constraining bats within a site, one could use replicated cages (constructed of metal, as  
206 we used, to prevent mice from chewing into the cages) with a single bat in each cage to prevent  
207 cascading disturbances from infected bats, or groups of bats that are analyzed as individual data  
208 points. In addition, barriers to prevent larger predators (e.g. raccoons) from accessing the cages  
209 and eating the bats are an absolute necessity. Cages are not ideal in that they limit bats'  
210 movement within sites, but they offer higher certainty in terms of knowing the survival of each  
211 individual.

212 In conclusion, preventing population declines due to WNS in *M. lucifugus* and other  
213 species will likely require a combination of multiple approaches<sup>8</sup>. Potential strategies that could  
214 be combined with treatment include reducing the environmental reservoir of *P. destructans*<sup>3,26</sup>,  
215 protecting and facilitating growth of populations of *M. lucifugus* that are now persisting with  
216 WNS (possibly due to resistance that limits fungal growth to moderate loads<sup>6</sup> or increased fat  
217 stores that allow bats to tolerate infection<sup>27</sup>), and improving summer and fall habitat for bats to  
218 increase reproduction and fat storage for hibernation. The latter two strategies would facilitate  
219 the evolution of resistance or tolerance which reduces the need for perpetual management action  
220<sup>28,29</sup>. Finally, any strategy which slows or stops the very rapid local extirpations of *M.*  
221 *septentrionalis* colonies is urgently needed to prevent this species from extinction.

222

## 223 **Methods**

224 We performed the field trial on *M. lucifugus* bats in the winter of 2015-16 at an inactive  
225 mine in southwest Wisconsin where *P. destructans* was detected the previous winter 2014-15.  
226 The mine has one large (~3m tall by 5 m wide) entrance that was gated several years earlier, and

227 a single smaller entrance that was sealed with a fine mesh metal screen the year of the gating.  
228 We selected a site where *P. destructans* had been detected the previous year because lab trials  
229 with *P. fluorescens* had indicated that treating bats at the time of infection was more beneficial  
230 than treatment prior to infection<sup>16</sup>, and previous work suggests that most bats become infected  
231 early in the second year following *P. destructans* invasion, likely due to build-up of an  
232 environmental reservoir<sup>3</sup>. This site had 226 *M. lucifugus* in November 2014, before *P.*  
233 *destructans* was detected, but the colony had declined to 82 bats by March 2015. The average  
234 temperature where *M. lucifugus* roosted was  $7.0^{\circ}\text{C} \pm 0.4^{\circ}\text{C}$ . We screened 55 samples for *P.*  
235 *fluorescens* by PCR from bats collected in the winter of 2014-15 to confirm that *P. fluorescens*  
236 naturally occurred on bats found in the site to address concerns regarding using a live bacterium  
237 as a treatment. We found DNA from *P. fluorescens* present in 20% of samples and from all four  
238 species sampled (Little brown myotis (*Myotis lucifugus*), Northern long-eared myotis (*Myotis*  
239 *septentrionalis*), Tri-colored bat (*Perimyotis subflavus*), and Big brown bat (*Eptesicus fuscus*)).

240 In September 2015 we installed a PIT-tag reader (IS1001 and HPR reader, Biomark Inc.,  
241 Boise, ID) at the site entrance (Figure S1), and 3 metal screen cages (46x30x51 cm Fresh Air  
242 Screen Habitat, Zilla Products, Franklin, WI, USA) in a small chamber in the back of the mine  
243 where bats roosted in previous winters. We removed the top of each cage and mounted cages  
244 directly to the ceiling to allow bats direct access to mine substrate for roosting, and to allow for  
245 natural infection and reinfection. We also installed chicken wire with a hinged gate at the  
246 entrance of the cage room to prevent large predators (e.g. raccoons) from entering.

247 We briefly visited the site on Nov 16<sup>th</sup> (total time underground 14 minutes) to count the  
248 number of bats present and to assess the *P. destructans* infection status of the bats at the site. We  
249 counted approximately 95 *M. lucifugus* and sampled six of them by dipping a sterile polyester

250 swab in sterile water to moisten it and then rubbing the swab five times across both the forearm  
251 and muzzle of a bat<sup>20</sup>. We tested these samples for *P. destructans* DNA using qPCR<sup>30</sup>, and all  
252 six samples tested positive.

253 We returned to the site for the experimental treatment on Nov 20, 2015. We sealed off the  
254 entrance to the site (Figure S1) using fine mesh cloth to prevent bats from leaving the site during  
255 the treatment. We collected all *M. lucifugus* we could find at the site (89 bats; 23 females and 66  
256 males) and placed them individually in paper bags and brought them to a processing station near  
257 the entrance of the site. We weighed bats to the nearest 0.1 g with an electronic scale, but we did  
258 not take a length measurement (e.g. forearm) to minimize handling time and disturbance. Recent  
259 work has shown that body mass is equally accurate in predicting fat stores (as measured by  
260 quantitative magnetic resonance) as body condition indices<sup>31</sup>. We sampled bats for *P.*

261 *destructans* as described above and banded each bat with an aluminum band (2.9mm; Porzana  
262 Ltd., Icklesham, E. Sussex, U.K.), that had a PIT tag attached (see Supplemental Methods text).

263 We randomly assigned bats to each of three treatment groups: control (29), chitosan (29),  
264 and *P. fluorescens* (31). We treated each bat by spraying ~2ml of a solution containing *P.*  
265 *fluorescens* or chitosan solution (see Supplemental Methods text) on their wings and tail with a  
266 spray bottle (FantaSea, Blaine, WA). For control bats we replicated the handling disturbance but  
267 did not spray any liquid onto bats because both of our treatments could only be applied in liquid  
268 form and the goal of our study was to determine the effect of treatment compared to untreated  
269 bats. We split bats in each treatment group into the two experiments based on a power analysis  
270 (Figure S2) – cage (15 for each treatment group in a single cage for each treatment; 5 females  
271 and 10 males per cage) and free-flying (16, 14, and 14 bats in the *P. fluorescens*, chitosan and  
272 control groups, respectively). After treatment bats were released into cages or into the site onto a

273 recovery cloth ~75m away from the processing station. We removed the mesh from the site  
274 entrance so bats could freely pass through the opening surrounded by the PIT tag antenna (Figure  
275 S1). We blocked off the rest of the entrance with screening to discourage bats from attempting to  
276 leave the site without passing by the PIT tag antenna. The total time underground was 65  
277 minutes.

278 We returned to the site on March 8, 2016. We removed all the bats from the cages and  
279 captured all free-flying bats we could find (some portions of the site are inaccessible). Each bat  
280 was swabbed as described above, and one wing was photographed under ultra-violet (UV) light  
281 to measure an index of disease severity<sup>32,33</sup>. We then released all bats into the site. We  
282 downloaded data from the PIT tag reader on July 30, 2016 to determine the dates that bats with  
283 PIT tags were detected by the PIT tag reader. We note that detection by the PIT tag reader does  
284 not indicate the direction of travel when a bat is detected by the PIT tag reader (i.e. into or out of  
285 the mine). It only indicates that the bat was alive on that date and passed near (within ~15-20  
286 cm) the PIT tag antennae.

287 When processing bats from the cage experiment, we noted that some (five of 16, or 31%)  
288 of the PIT tags had become detached from the bands on the bats. As a result, we subsequently  
289 searched the site when no bats were present with a handheld PIT tag reader to determine whether  
290 free-flying had also lost their PIT tags. We found seven PIT tags that were not attached to bands,  
291 suggesting that known PIT tag loss in the free-flying group (seven of 24, or 29.2% of the bats  
292 that were never recorded on the PIT tag reader) was similar to that in the cage experiment (31%).  
293 There may have been additional bats in the free-flying group that lost their PIT tags (making our  
294 survival estimates underestimates), but there is no evidence that PIT tag loss differed by  
295 treatment group (*P. fluorescens* 4/31, chitosan 5/29; control 4/29; Fisher's exact test  $P = 0.93$ ).

296 We removed the bats who had lost their PIT tags (three *P. fluorescens*, one control, three  
297 chitosan) from analyses for the free-flying group since we could not detect them on the PIT tag  
298 reader. We added a new band with a PIT tag to any bat from the cage trial that had lost its PIT  
299 tag or band.

300 We determined the efficacy of the treatments by comparing apparent overwinter survival  
301 of bats in the three treatments, with and without accounting for differences in initial individual  
302 fungal loads and body mass. We assumed bats that were never detected by the PIT tag reader  
303 died in the site because our reader antennae provided full coverage of the entrance and had  
304 sufficient sensitivity to detect tags on flying bats. We assumed that any bats alive and detected  
305 by the PIT tag reader on or after March 7, 2016 had survived the winter (which we term  
306 “apparent overwinter survival”). We used March 7<sup>th</sup> as a cut-off for apparent overwinter survival  
307 because after March 7, 2016 surface temperatures near the mine were consistently above 2°C  
308 (Figure 1). Bats detected by the PIT tag reader prior to March 7<sup>th</sup> could have either emerged from  
309 the site and subsequently died or successfully emigrated to another hibernacula. Alternatively  
310 bats may have been detected alive flying at the mine entrance but remained in the site and  
311 subsequently died and never detected again. In the absence of data confirming any of these bats  
312 survived the winter, we assume they either died or permanently emigrated. In March, we  
313 searched all known sites within 50 km for banded bats and did not find any. However,  
314 emigration to unknown sites may have occurred. We also compared the latest date a bat was  
315 detected by the PIT tag reader between treatments as a continuous response variable of the last  
316 known date alive, while controlling for fungal loads and mass. Finally, we examined differences  
317 among treatment groups in UV fluorescence among individuals surviving the cage experiment,  
318 as an indicator of disease severity. We hypothesized that bats treated with *P. fluorescens* or

319 chitosan would have higher survival, have a later last detection (by the PIT tag reader) date, and  
320 lower UV fluorescence than the control group and that apparent overwinter survival would  
321 increase with initial body mass and lower initial fungal loads in both experiments.

322 All research was performed as described under protocol Kilp1509 approved by the  
323 University of California, Santa Cruz's IACUC committee.

324

## 325 Literature Cited

- 326 1 Warnecke, L. *et al.* Inoculation of bats with European *Geomyces destructans* supports  
327 the novel pathogen hypothesis for the origin of white-nose syndrome. *Proc. Natl.*  
328 *Acad. Sci. U. S. A.* **109**, 6999-7003 (2012).
- 329 2 Langwig, K. E. *et al.* Sociality, density-dependence and microclimates determine the  
330 persistence of populations suffering from a novel fungal disease, white-nose  
331 syndrome. *Ecol Lett* **15**, 1050-1057 (2012).
- 332 3 Langwig, K. E. *et al.* Invasion dynamics of white-nose syndrome fungus, midwestern  
333 United States, 2012–2014. *Emerging Infectious Disease* **21**, 1023-1026 (2015).
- 334 4 Frick, W. F. *et al.* Disease alters macroecological patterns of North American bats.  
335 *Glob. Ecol. Biogeogr.* **24**, 741-749, doi:10.1111/geb.12290 (2015).
- 336 5 Hoyt, J. R. *et al.* Cryptic connections illuminate pathogen transmission within  
337 community networks. *Nature*, doi:10.1038/s41586-018-0720-z (2018).
- 338 6 Langwig, K. E. *et al.* Resistance in persisting bat populations after white-nose  
339 syndrome invasion. *Philos. Trans. R. Soc. B-Biol. Sci.* **372**, 20160044,  
340 doi:10.1098/rstb.2016.0044 (2017).
- 341 7 Frick, W. F. *et al.* An emerging disease causes regional population collapse of a  
342 common North American bat species. *Science* **329**, 679-682,  
343 doi:10.1126/science.1188594 (2010).
- 344 8 Langwig, K. E. *et al.* Context dependent conservation responses to emerging wildlife  
345 diseases. *Front. Ecol. Environ.* **13**, 195–202, doi:10.1890/140241 (2015).
- 346 9 FWS, U. S. *A National Plan for Assisting States, Federal Agencies, and Tribes in*  
347 *Managing White-Nose Syndrome in Bats*,  
348 <<https://pubs.er.usgs.gov/publication/70039214>> (2011).
- 349 10 Myers, J. M. *et al.* Synergistic inhibition of the lethal fungal pathogen  
350 *Batrachochytrium dendrobatidis*: the combined effect of symbiotic bacterial  
351 metabolites and antimicrobial peptides of the frog *Rana muscosa*. *J Chem Ecol.* **38**,  
352 958-965, doi:doi: 10.1007/s10886-012-0170-2 (2012).
- 353 11 Gram, L., Melchiorson, J., Spanggaard, B., Huber, I. & Al, G. Inhibition of *Vibrio*  
354 *anguillarum* by *Pseudomonas fluorescens* AH2, a possible probiotic treatment of fish.  
355 *Appl Environmental Microbiol* **65**, 969–973 (1999).



- 356 12 Bangera, M. & Thomashow, L. Identification and characterization of a gene cluster  
357 for synthesis of the polyketide antibiotic 2,4-Diacetylphloroglucinol from  
358 *Pseudomonas fluorescens* Q2-87. *J. Bacteriol.* **181**, 3155–3163 (1999).
- 359 13 Hoyt, J. R. *et al.* Bacteria isolated from bats inhibit the growth of *Pseudogymnoascus*  
360 *destructans*, the causative agent of white-nose syndrome. *PLoS One* **10**, e0121329,  
361 doi:DOI: 10.1371/journal.pone.0121329 (2015).
- 362 14 Prashanth, K. V. H. & Tharanathan, R. N. Chitin/chitosan: modifications and their  
363 unlimited application potential - an overview. *Trends in Food Science & Technology*  
364 **18**, 117-131, doi:10.1016/j.tifs.2006.10.022 (2007).
- 365 15 Vonhof, M. J., Carter, T. C., Eversole, R. R. & Keel, M. K. Testing the Efficacy of  
366 Chitosan to combat growth of *Pseudogymnoascus destructans* on Experimentally-  
367 Infected Little Brown Bats. *White-nose syndrome workshop* (US FWS, Grand Rapids,  
368 MI, 2015).
- 369 16 Cheng, T. L. *et al.* Efficacy of a probiotic bacterium to treat bats affected by the  
370 disease white-nose syndrome. *J. Appl. Ecol.* **54**, 701-708, doi:10.1111/1365-  
371 2664.12757 (2017).
- 372 17 Lorch, J. M. *et al.* Experimental infection of bats with *Geomyces destructans* causes  
373 white-nose syndrome. *Nature* **480**, 376–378, doi:doi:10.1038/nature10590 (2011).
- 374 18 Johnson, J. S. *et al.* Host, Pathogen, and Environmental Characteristics Predict White-  
375 Nose Syndrome Mortality in Captive Little Brown Myotis (*Myotis lucifugus*). *Plos*  
376 *One* **9**, e112502, doi:10.1371/journal.pone.0112502 (2014).
- 377 19 Frick, W. F. *et al.* Pathogen dynamics during invasion and establishment of white-  
378 nose syndrome explain mechanisms of host persistence. *Ecology* **98**, 624-631,  
379 doi:10.1002/ecy.1706 (2017).
- 380 20 Langwig, K. E. *et al.* Host and pathogen ecology drive the seasonal dynamics of a  
381 fungal disease, white-nose syndrome. *Proceedings of the Royal Society B: Biological*  
382 *Sciences* **282**, 20142335, doi:<http://dx.doi.org/10.1098/rspb.2014.2335> (2015).
- 383 21 Bletz, M. C. *et al.* Mitigating amphibian chytridiomycosis with bioaugmentation:  
384 characteristics of effective probiotics and strategies for their selection and use. *Ecol*  
385 *Lett* **16**, 807-820 (2013).
- 386 22 Langwig, K. E. *et al.* Drivers of variation in species impacts for a multi-host fungal  
387 disease of bats. *Philos. Trans. R. Soc. B-Biol. Sci.* **371**, 20150456,  
388 doi:10.1098/rstb.2015.0456 (2016).
- 389 23 Turner, J. M. *et al.* Conspecific disturbance contributes to altered hibernation  
390 patterns in bats with white-nose syndrome. *Physiol. Behav.* **140**, 71-78,  
391 doi:10.1016/j.physbeh.2014.12.013 (2015).
- 392 24 Reeder, D. M. *et al.* Frequent Arousal from Hibernation Linked to Severity of  
393 Infection and Mortality in Bats with White-Nose Syndrome. *Plos One* **7**,  
394 doi:10.1371/journal.pone.0038920 (2012).
- 395 25 Warnecke, L. *et al.* Pathophysiology of white-nose syndrome in bats: a mechanistic  
396 model linking wing damage to mortality. *Biology Letters* **9**, 20130177,  
397 doi:10.1098/rsbl.2013.0177 (2013).
- 398 26 Hoyt, J. R. *et al.* Long-Term Persistence of *Pseudogymnoascus destructans*, the  
399 Causative Agent of White-Nose Syndrome, in the Absence of Bats. *Ecohealth* **12**, 330-  
400 333, doi:10.1007/s10393-014-0981-4 (2015).



- 401 27 Cheng, T. L. *et al.* Higher fat stores contribute to persistence of little brown bat  
402 populations with white-nose syndrome. *J. Anim. Ecol.* (In Revision).
- 403 28 Kilpatrick, A. M. Facilitating the evolution of resistance to avian malaria in Hawaiian  
404 birds. *Biological Conservation* **128**, 475-485 (2006).
- 405 29 Maslo, B. & Fefferman, N. H. A case study of bats and white-nose syndrome  
406 demonstrating how to model population viability with evolutionary effects. *Conserv.*  
407 *Biol.* **29**, 1176-1185, doi:10.1111/cobi.12485 (2015).
- 408 30 Muller, L. K. *et al.* Bat white-nose syndrome: a real-time TaqMan polymerase chain  
409 reaction test targeting the intergenic spacer region of *Geomyces destructans*.  
410 *Mycologia* **105**, 253-259, doi:10.3852/12-242 (2013).
- 411 31 McGuire, L. P. *et al.* Common condition indices are no more effective than body mass  
412 for estimating fat stores in insectivorous bats. *J. Mammal.* **99**, 1065–1071 (2018).
- 413 32 Turner, G. G. *et al.* Nonlethal screening of bat-wing skin with the use of ultraviolet  
414 fluorescence to detect lesions indicative of white-nose syndrome. *J. Wildl. Dis.* **50**,  
415 566-573, doi:10.7589/2014-03-058 (2014).
- 416 33 McGuire, L. P. *et al.* White-nose syndrome disease severity and a comparison of  
417 diagnostic methods. *Ecohealth* **13**, 60-71 (2016).

418

419

420 **Acknowledgements:** Funding was provided by grants from Bat Conservation International, The  
421 Nature Conservancy, US Fish and Wildlife Service, and NSF (DEB-1115895 and DEB-  
422 1336290). We thank Maarten Vonhoff and Tim Carter for providing chitosan and for assistance  
423 in the field, Andrew Badje, Tyler Brandt, and Brian Heeringa for assistance in the field,  
424 Samantha Sambado for processing the UV-photos, and the Wagners for permission to use the  
425 site and logistical help.

426  
427 **Author Contributions:** AMK, JRH, KEL, JPW designed the study. AMK, JRH, KEL, JPW,  
428 HMK, JAR performed field research. KLP tested samples under JTF's supervision. AMK, JRH,  
429 KEL performed analyses and wrote manuscript. All authors reviewed and provided comments on  
430 the manuscript.

431 **Competing interests:** The author(s) declare no competing interests.

432 **Data availability:** The datasets generated during the current study are available from the  
433 corresponding author on reasonable request.

434

### 435 **Figure Legends**

436

437 **Figure 1. Bat body mass (A), *P. destructans* prevalence (B), and fungal loads (C) of *M.***  
438 ***lucifugus* in November in three treatment groups (chitosan (CH), control (CO), and *P.***  
439 ***fluorescens* (PF)).** There were 14-16 bats in each of the six treatment-experiment groups. There  
440 were no significant differences among treatment groups in fungal loads, prevalence or body mass  
441 in November (likelihood ratio-tests for treatment effect in linear models of mass, generalized  
442 linear models with a binomial distribution for prevalence, and linear models for log-transformed  
443 fungal loads: all P-values > 0.57).

444

445 **Figure 2. External air temperature, emergence date and fungal loads of bats in the free-**  
446 **flying bat experiment.** The top panel shows air temperature measured at the site entrance. In the  
447 lower panel, line color indicates the *P. destructans* fungal load (in nanograms) measured on bats  
448 in November. Lines end on the last date that each bat was detected by the PIT tag reader, and  
449 dotted vertical lines show the mean emergence date for each treatment group, indicated on the Y-

450 axis (Pf – *P. fluorescens*, Co – Control; Ch - Chitosan). The gray vertical bar shows the date after  
451 which emerging bats were assumed to have survived.

452  
453 **Figure 3. Apparent overwinter survival of bats in the free-flying experiment.** Columns show  
454 the fraction of bats in each treatment group that were known alive and detected by the PIT tag  
455 reader on or after March 7 (with binomial 95% CI; sample sizes for each group, left to right,  
456 were 13, 12, 11; the remaining 7 bats had lost their PIT tag; see Methods). Differences among  
457 treatments were significantly different, (Fisher’s exact test for all three treatments: two-tailed P =  
458 0.012). *P. fluorescens* – treated bats had higher apparent survival than the control group (Fisher’s  
459 exact test: one-tailed P = 0.046; logistic regression coef. =  $2.24 \pm 1.18$ ,  $z = 1.896$ , one-tailed P-  
460 value = 0.029), but there were no significant differences between chitosan-treated and control  
461 bats (Fisher’s exact test: one-tailed P = 0.47; logistic regression coef. =  $0.89 \pm 1.3$ ,  $z = 0.69$ , one-  
462 tailed P-value = 0.49).

463  
464 **Figure 4: November *P. destructans* fungal loads and the late date of detection for individual**  
465 **bats in the three treatment groups (Pf – *P. fluorescens*, Co – Control; Ch - Chitosan).** *P.*  
466 *fluorescens*-treated bats were last detected later than Control and Chitosan treated bats, and the  
467 last date of detection decreased (was earlier) with higher November *P. destructans* loads (*P.*  
468 *fluorescens* vs. control coef =  $1.05 \pm 0.57$ ,  $t = -1.91$ , one-tailed P-value = 0.039, early winter  
469 fungal loads: coef =  $0.61 \pm 0.32$ ,  $t = 1.84$ , one-tailed P-value = 0.040).

470  
471 **Figure 5. Survival, subsequent detection, and body mass of bats in the caged bat**  
472 **experiment.** Each horizontal line represents a single bat, with line color indicating the body  
473 mass of that bat measured in November. Bats surviving until release March 8 (gray vertical bar)  
474 are shown by darker lines, and bats that were subsequently detected by the PIT tag reader are  
475 extended to the last date they were detected. Treatment is indicated by the first two letters of the  
476 bat identification number on the Y-axis (PF – *P. fluorescens*, CO – Control; CH - Chitosan).

477  
478 **Figure 6. *P. destructans* (a) fungal loads, and (b) disease severity (UV) for bats in the cage**  
479 **experiment that survived to March 8, and (c) differences in November mass between bats**  
480 **in the cage experiment that survived to March 8, or died.** March fungal loads did not differ  
481 among treatment groups (likelihood ratio-tests for treatment effect in models of log-transformed  
482 fungal loads: P-value > 0.77). Disease severity (ultraviolet fluorescence) was significantly higher  
483 for chitosan-treated bats than control bats (regression on arc-sin sqrt transformed data: control vs.  
484 chitosan: coef =  $0.15 \pm 0.068$ ,  $z = 2.273$ , P-value = 0.037; control vs. *P. fluorescens*: coef =  
485  $0.017 \pm 0.073$ ,  $z = 0.234$ , P-value = 0.82).

486  
487

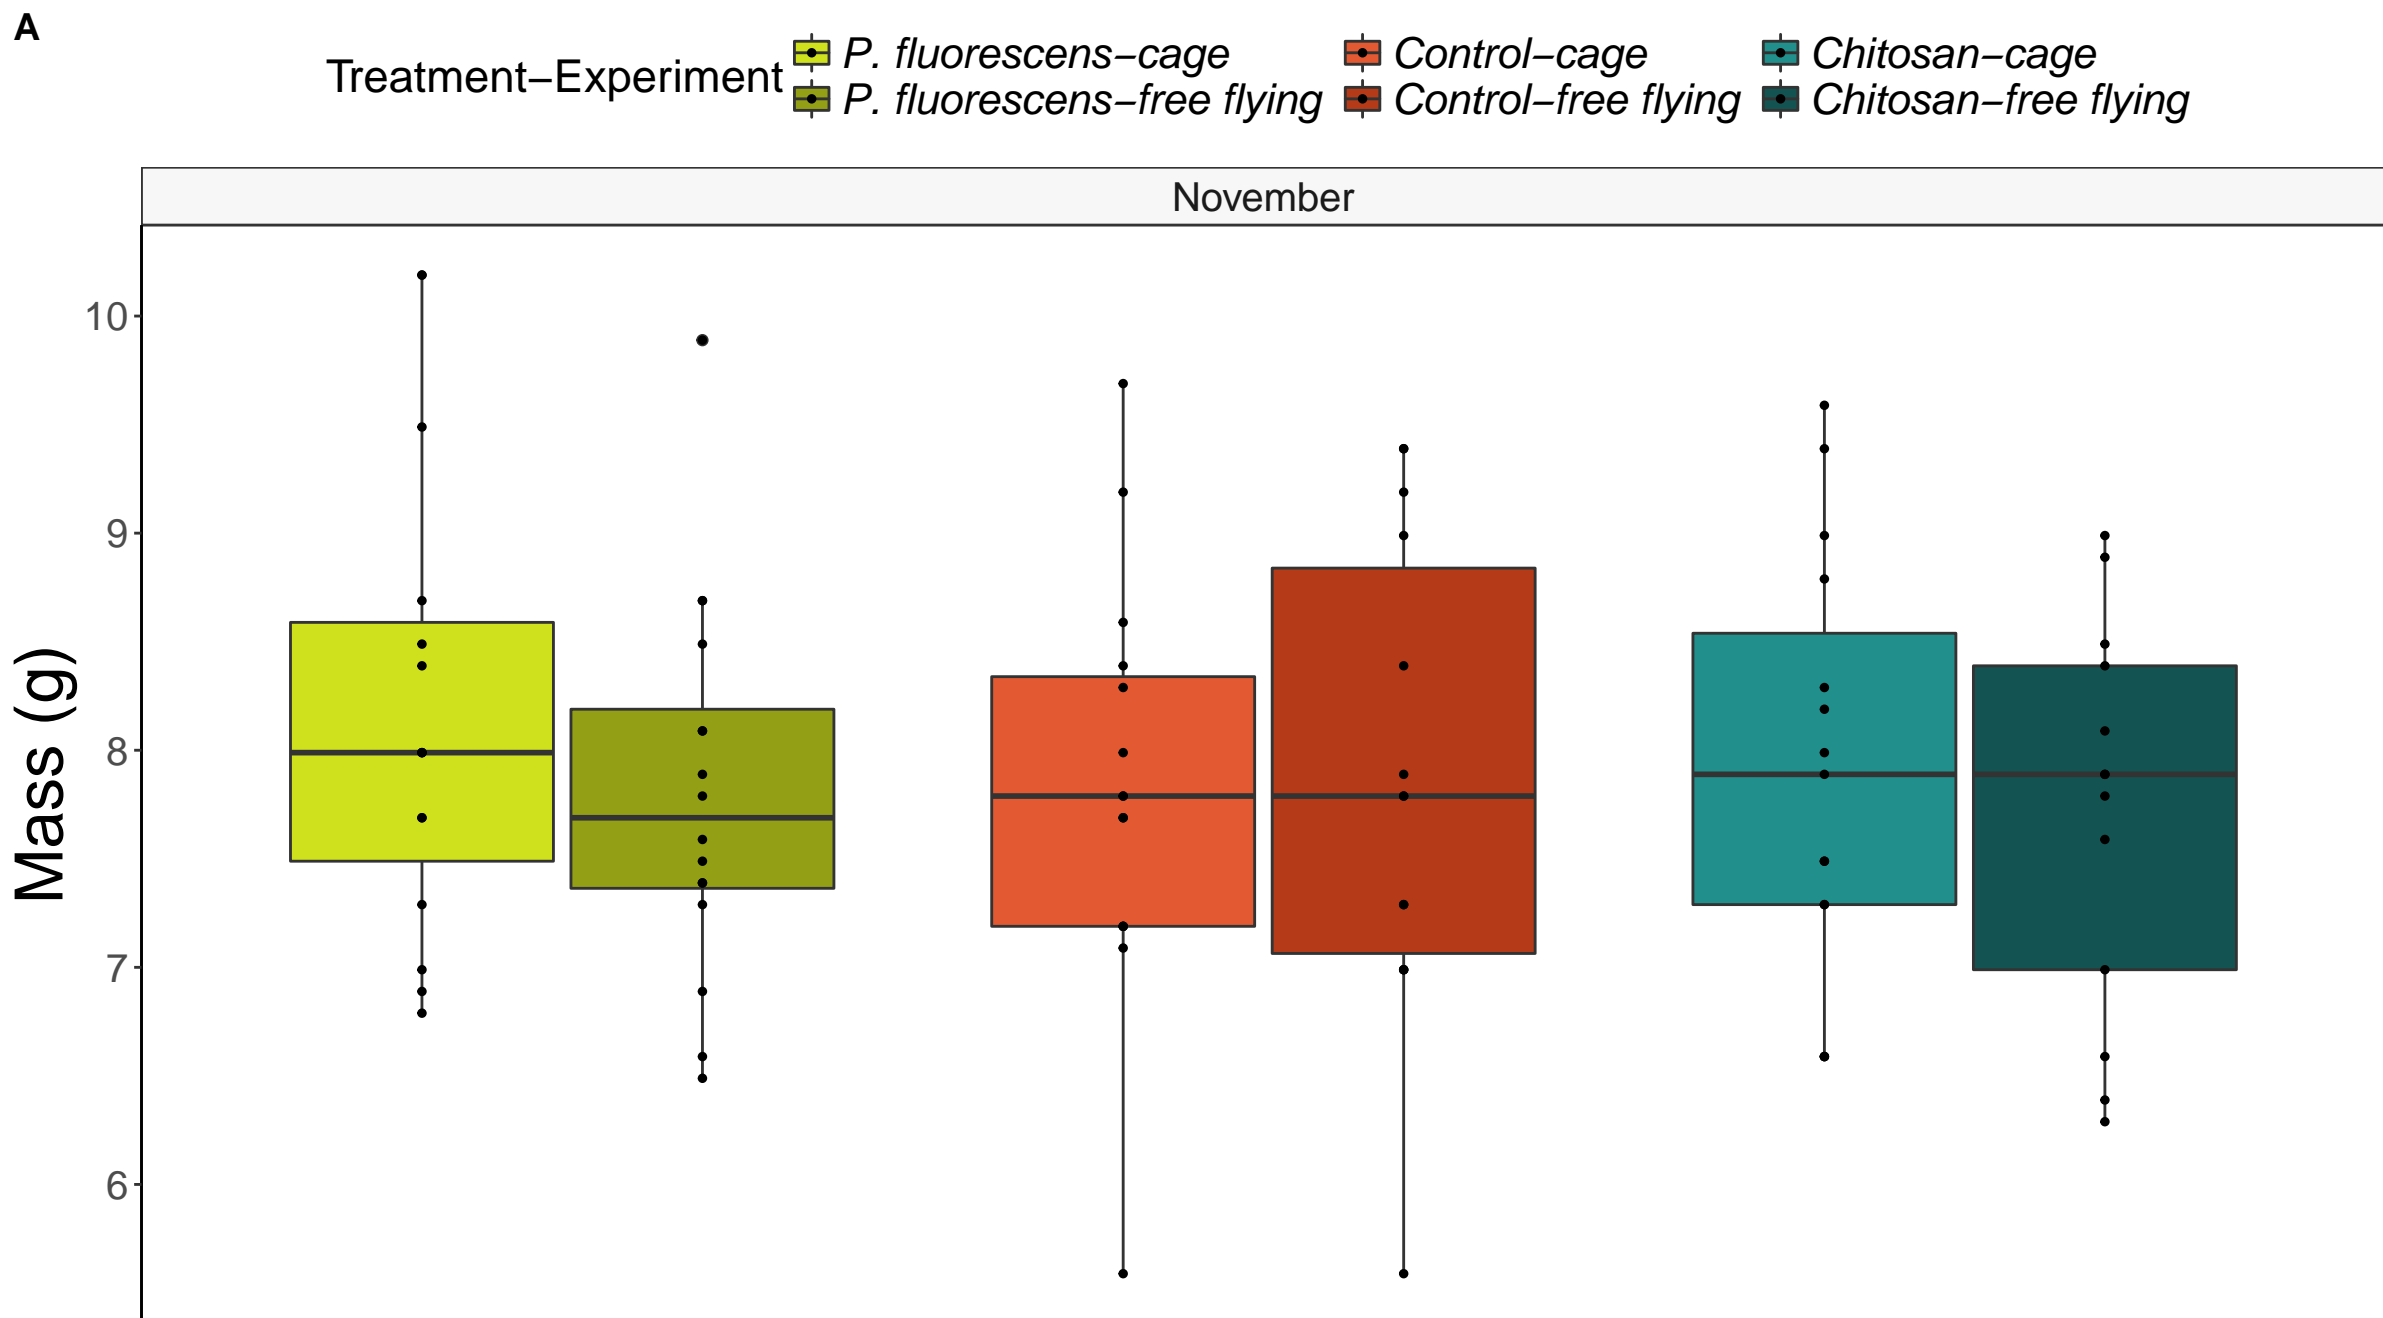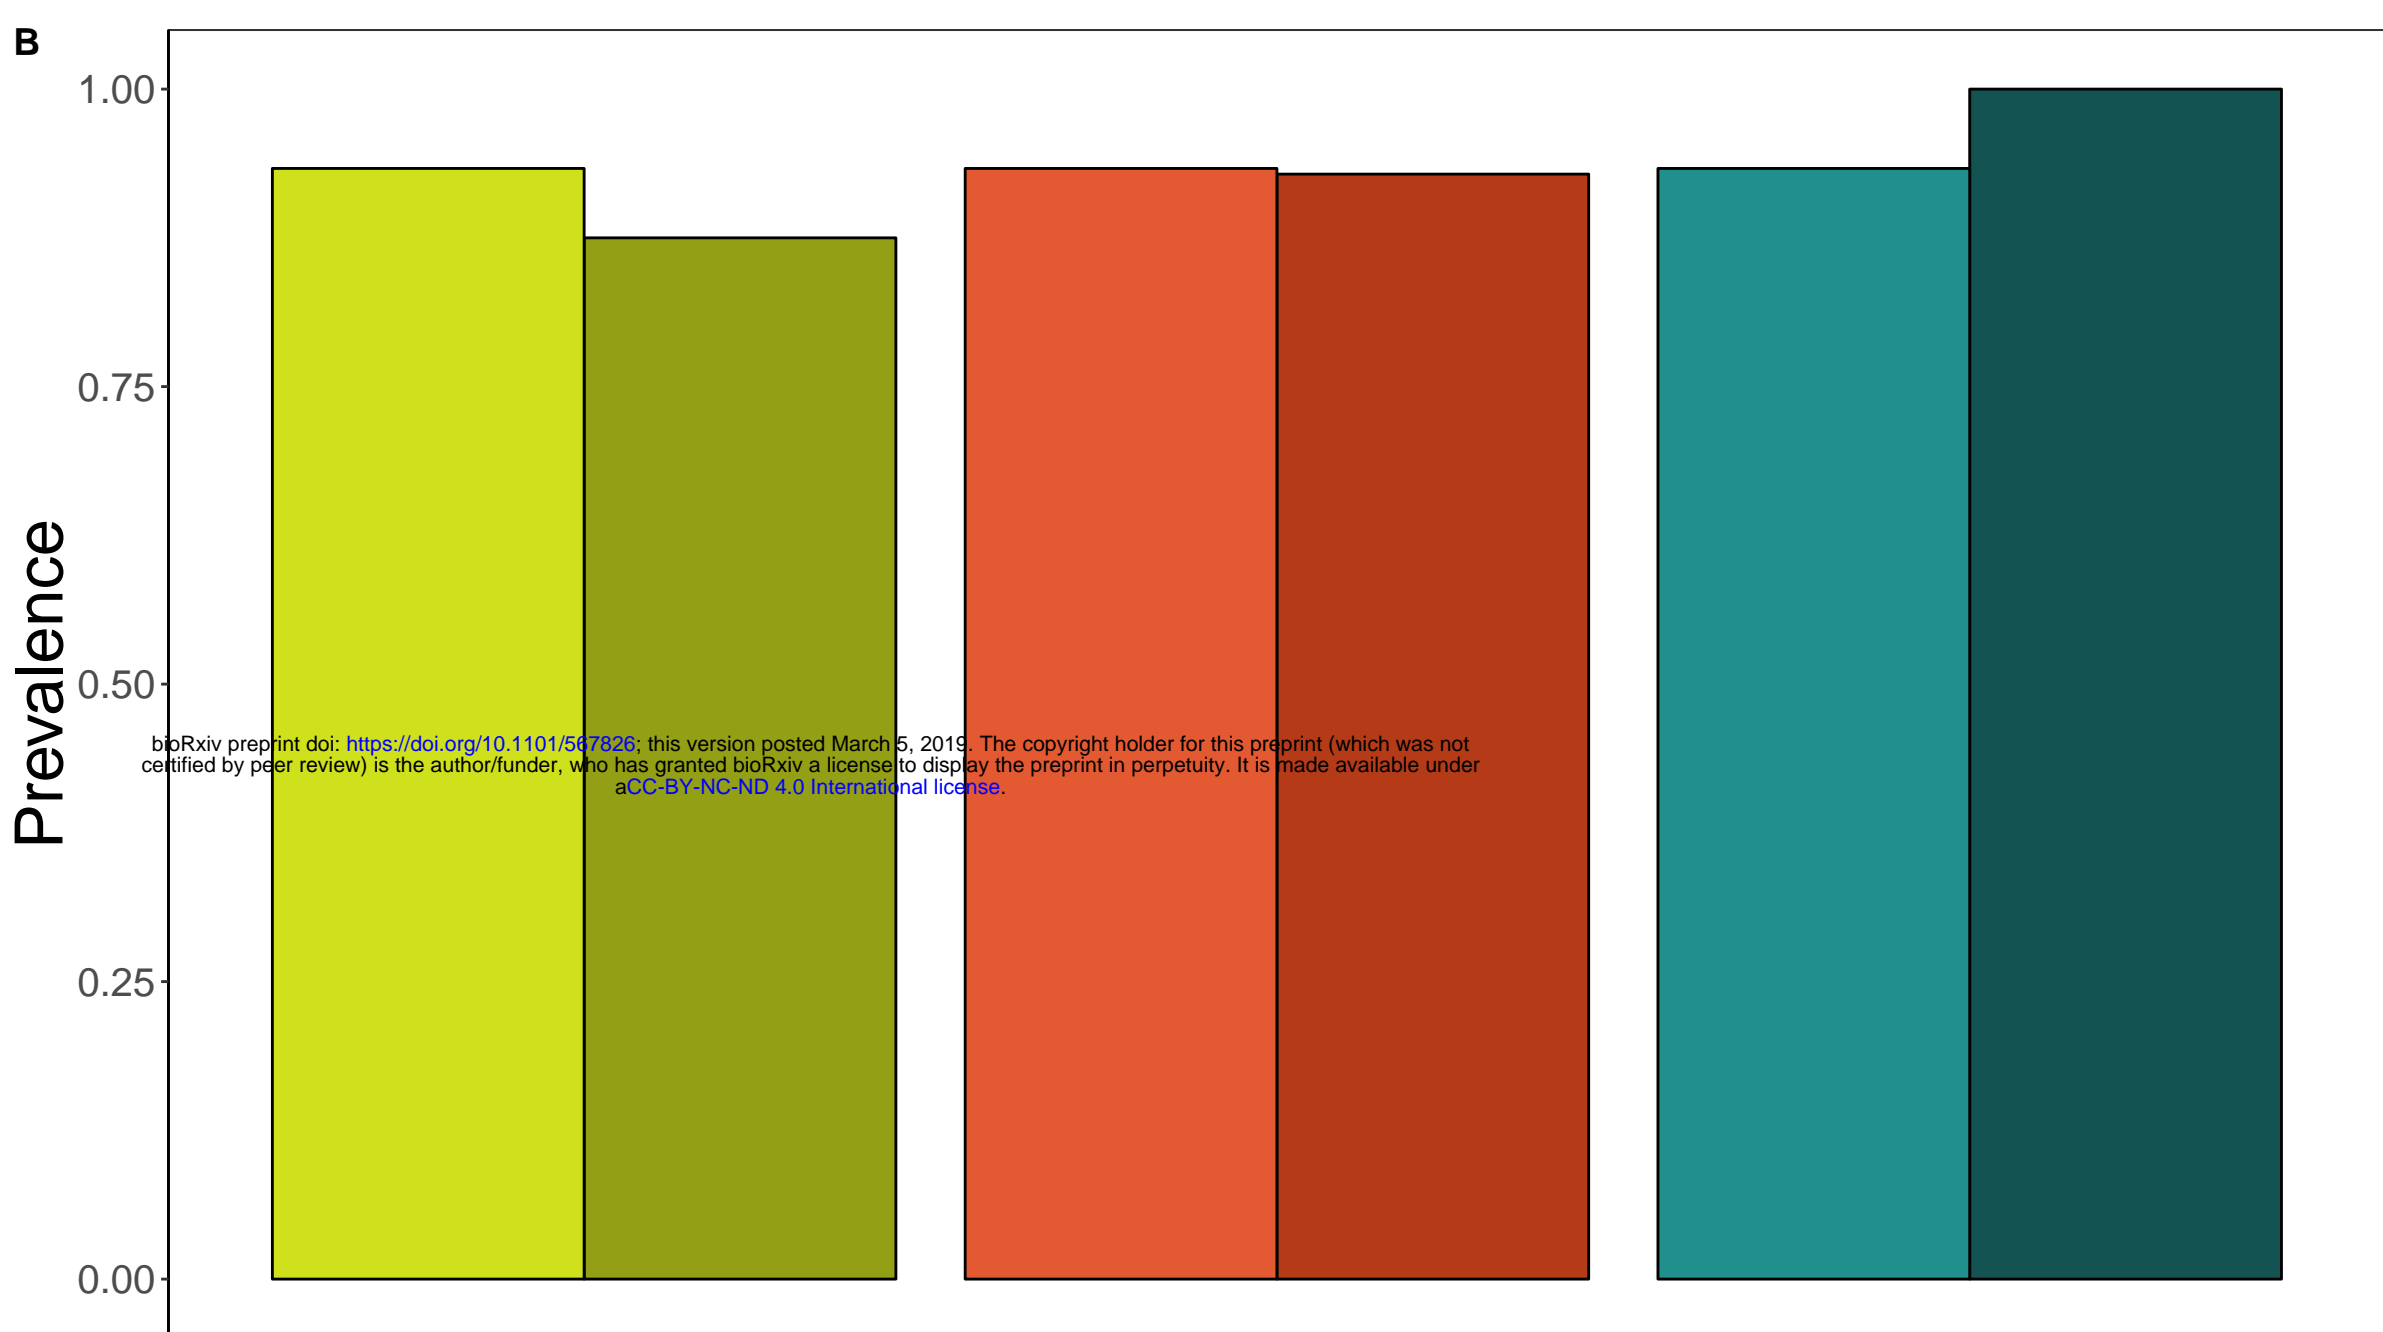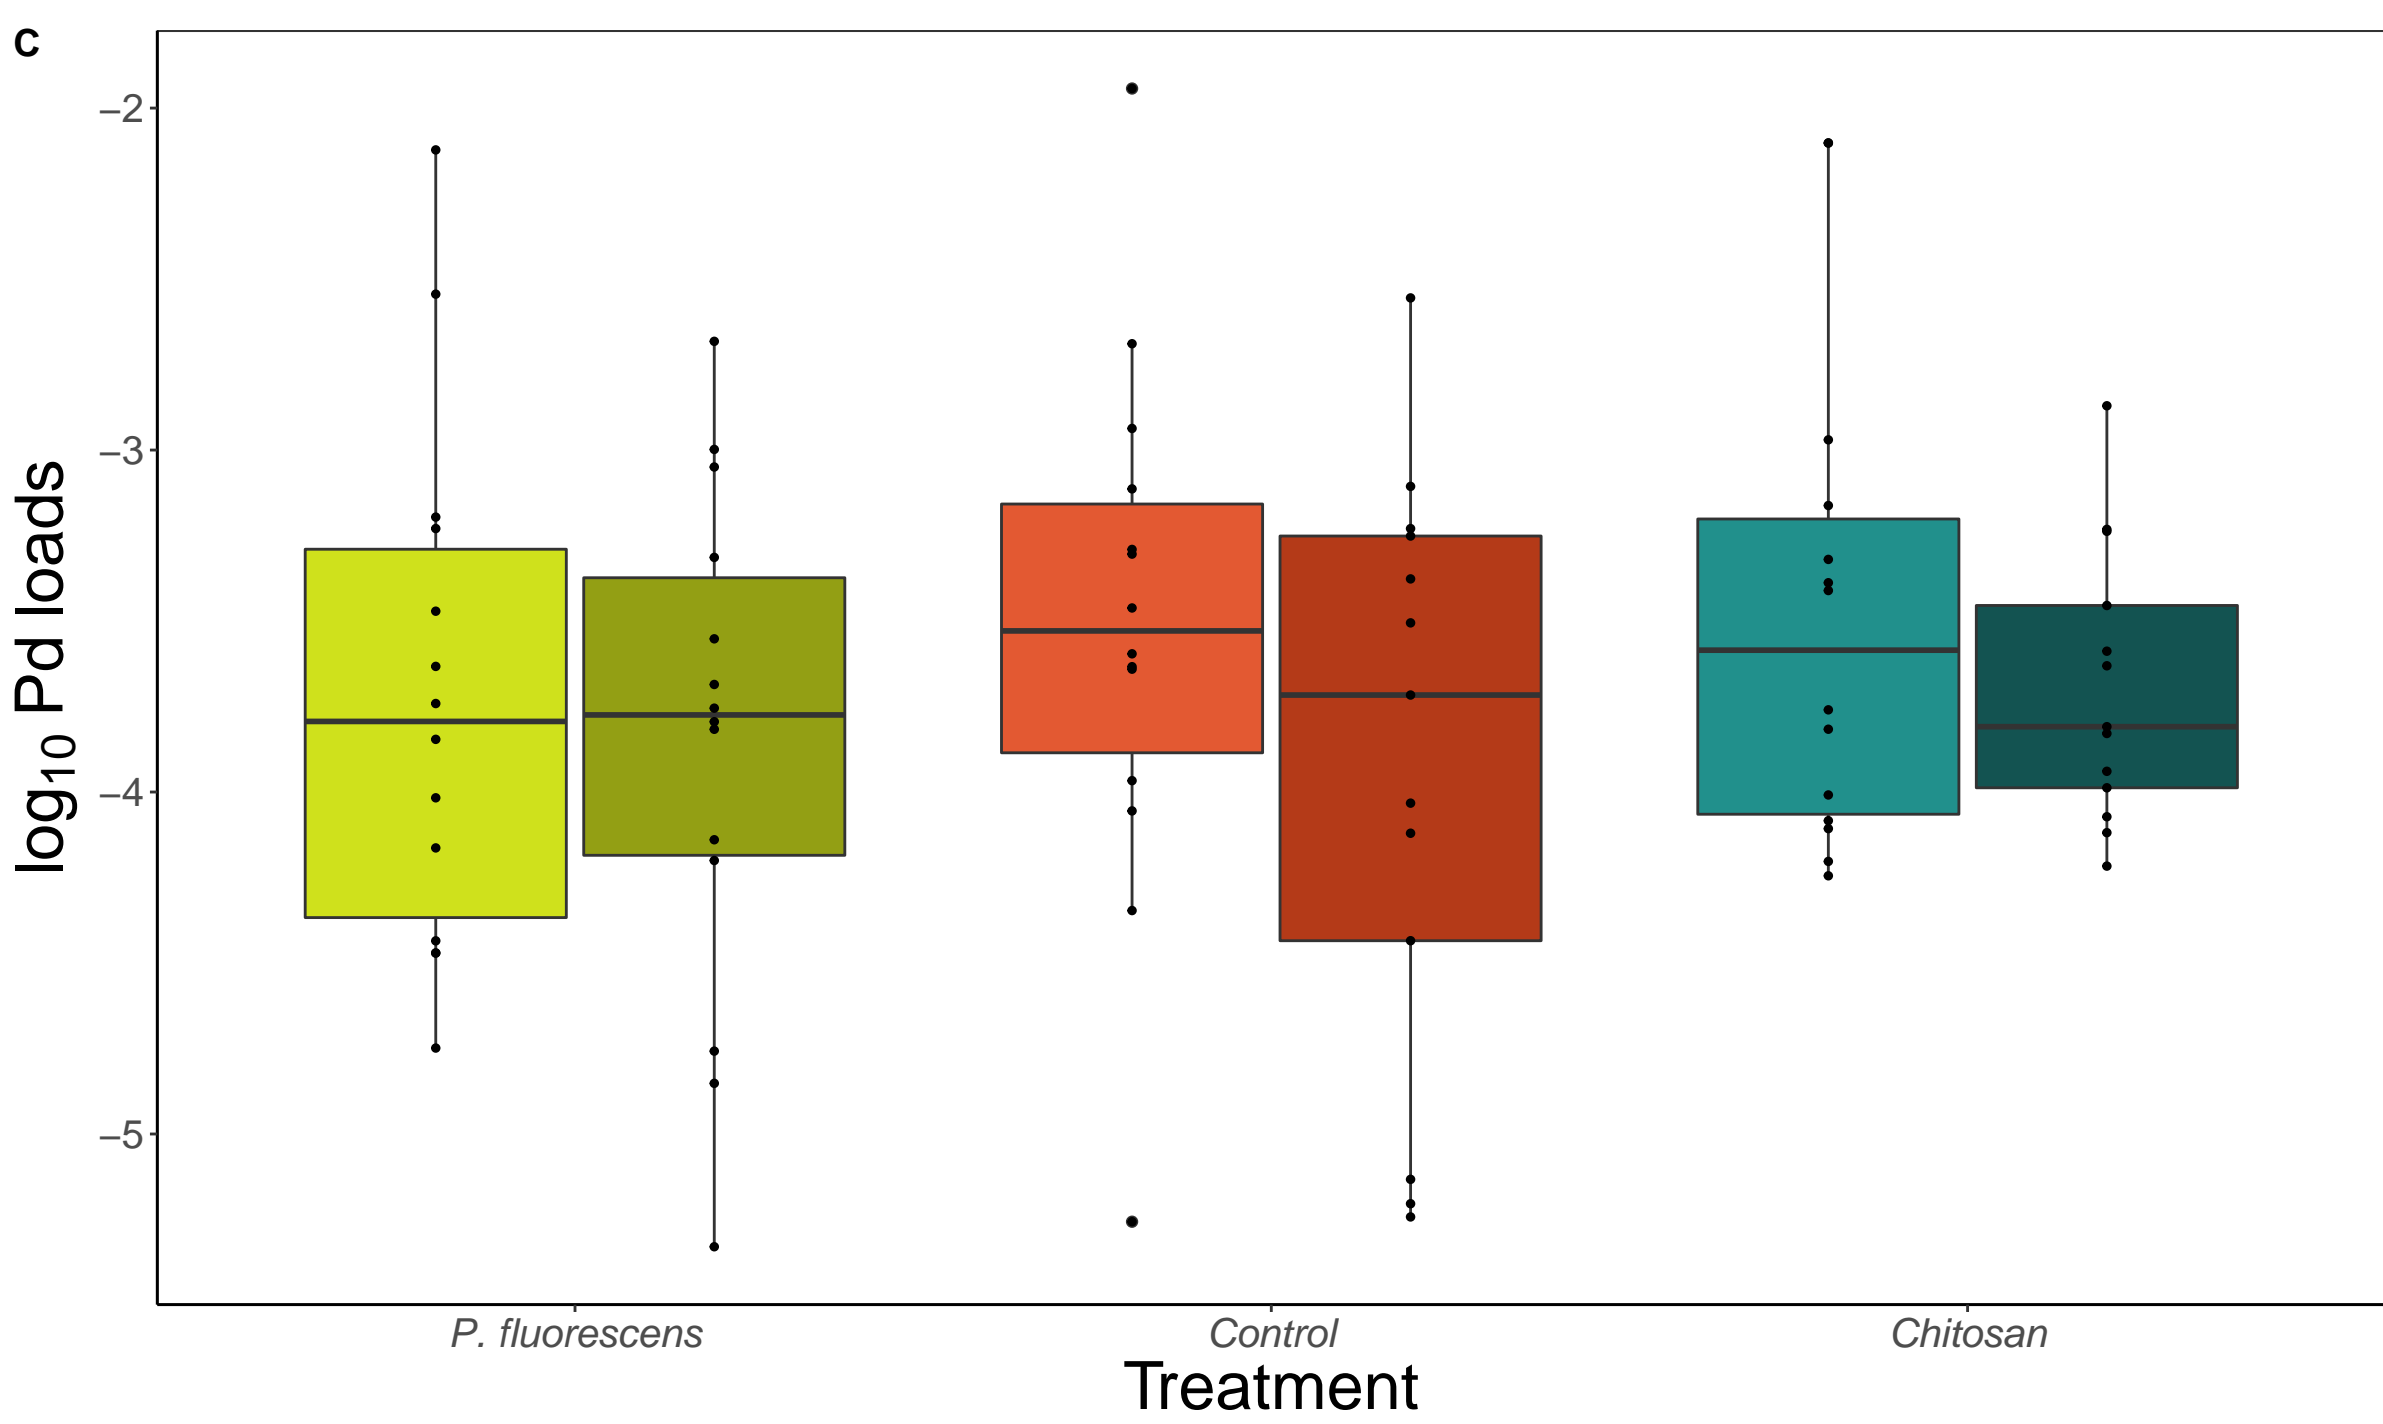

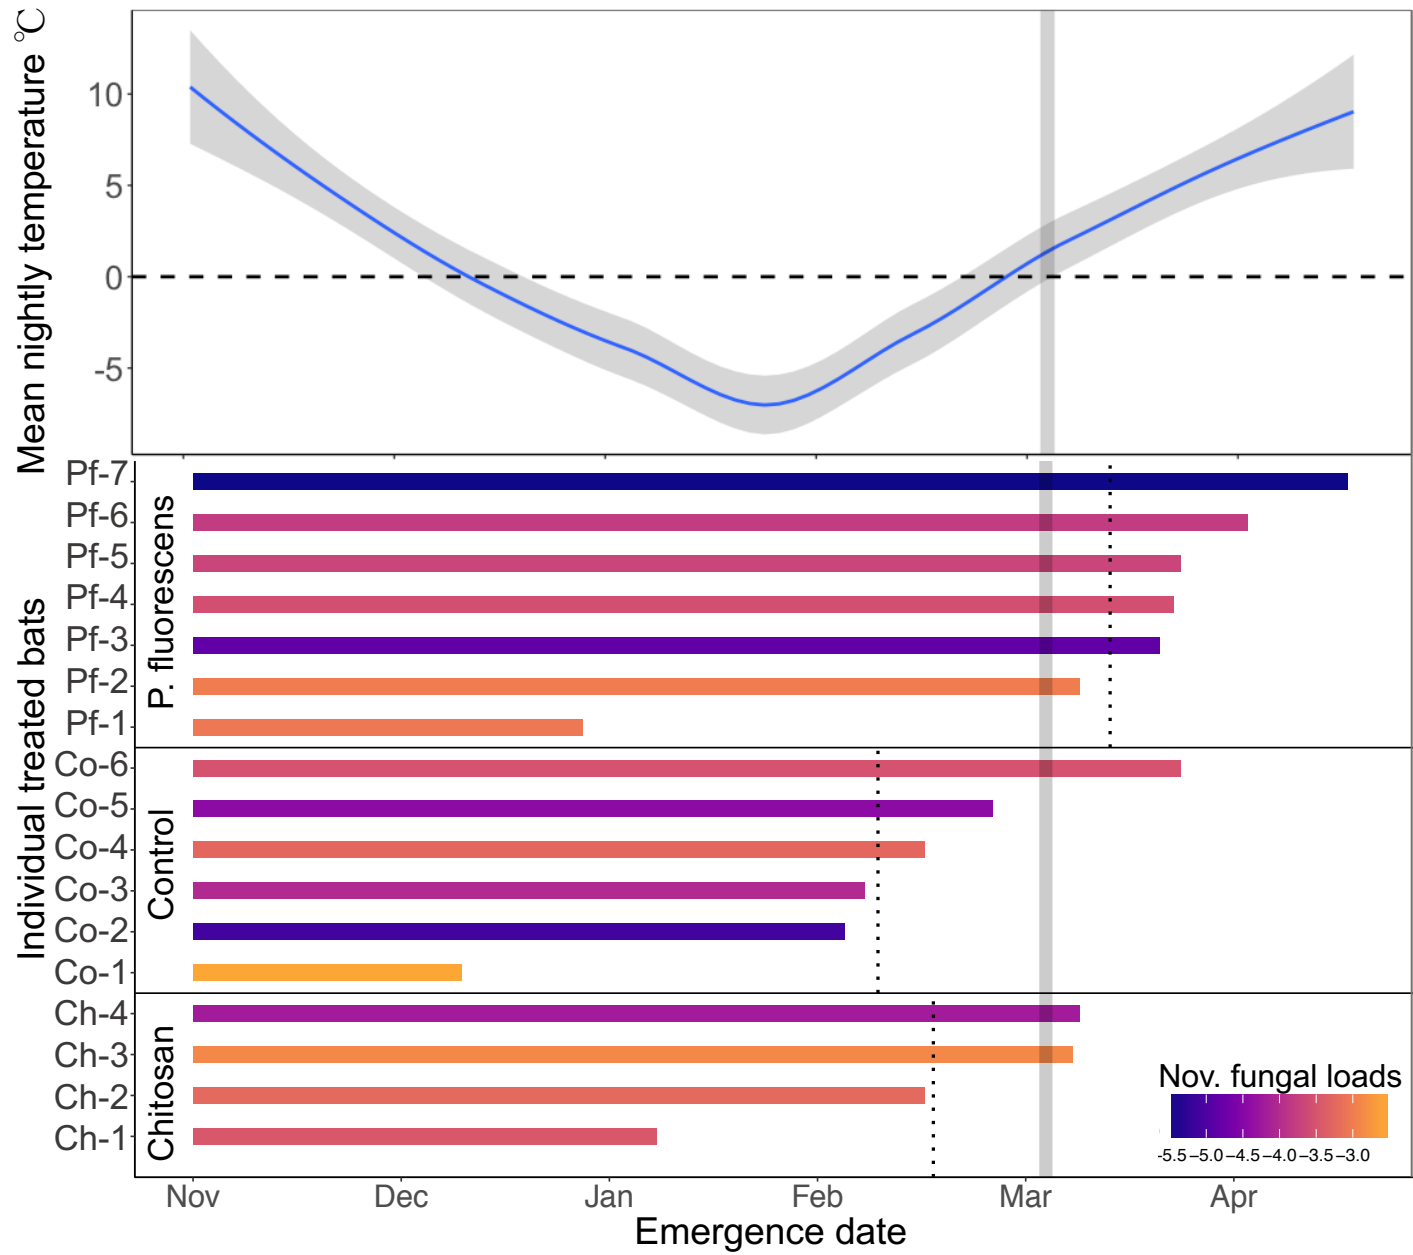

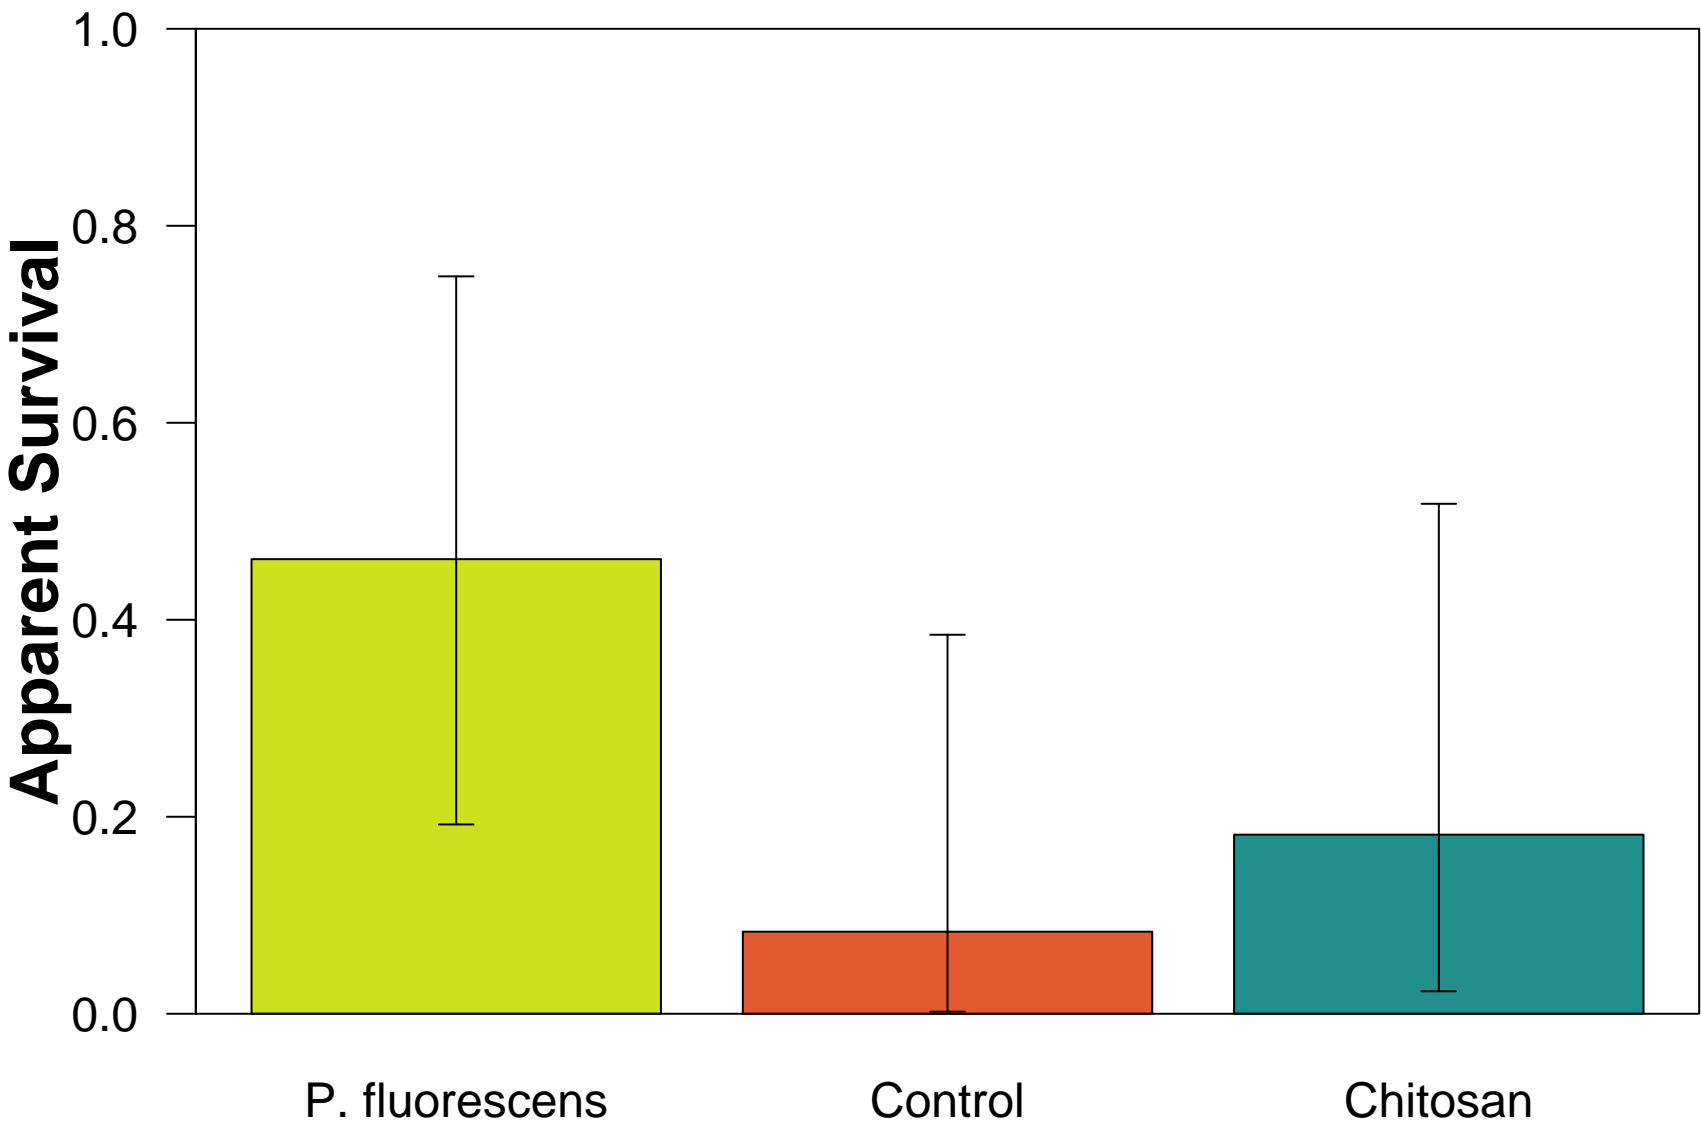

Last Date Detected

Apr  
Mar  
Feb  
Jan

November  $\log_{10}$  Pd loads

- CH
- CO
- PF

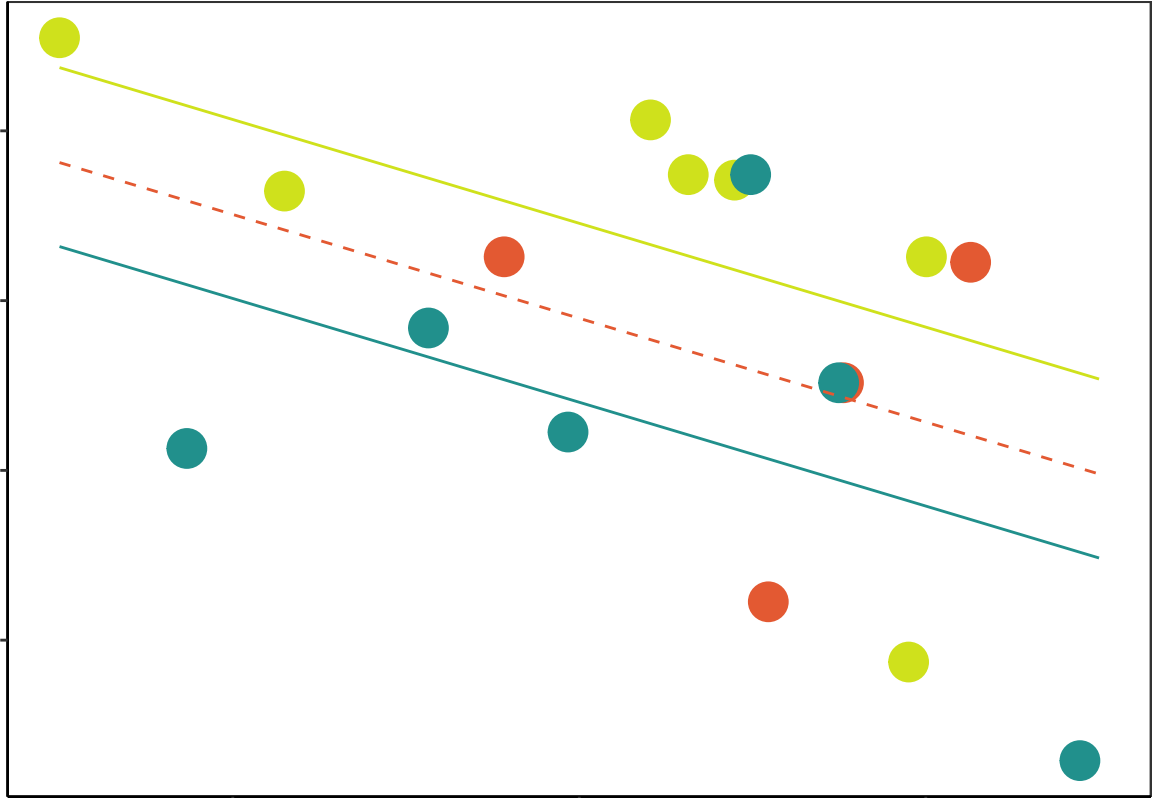

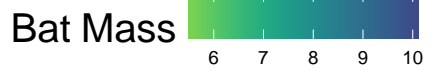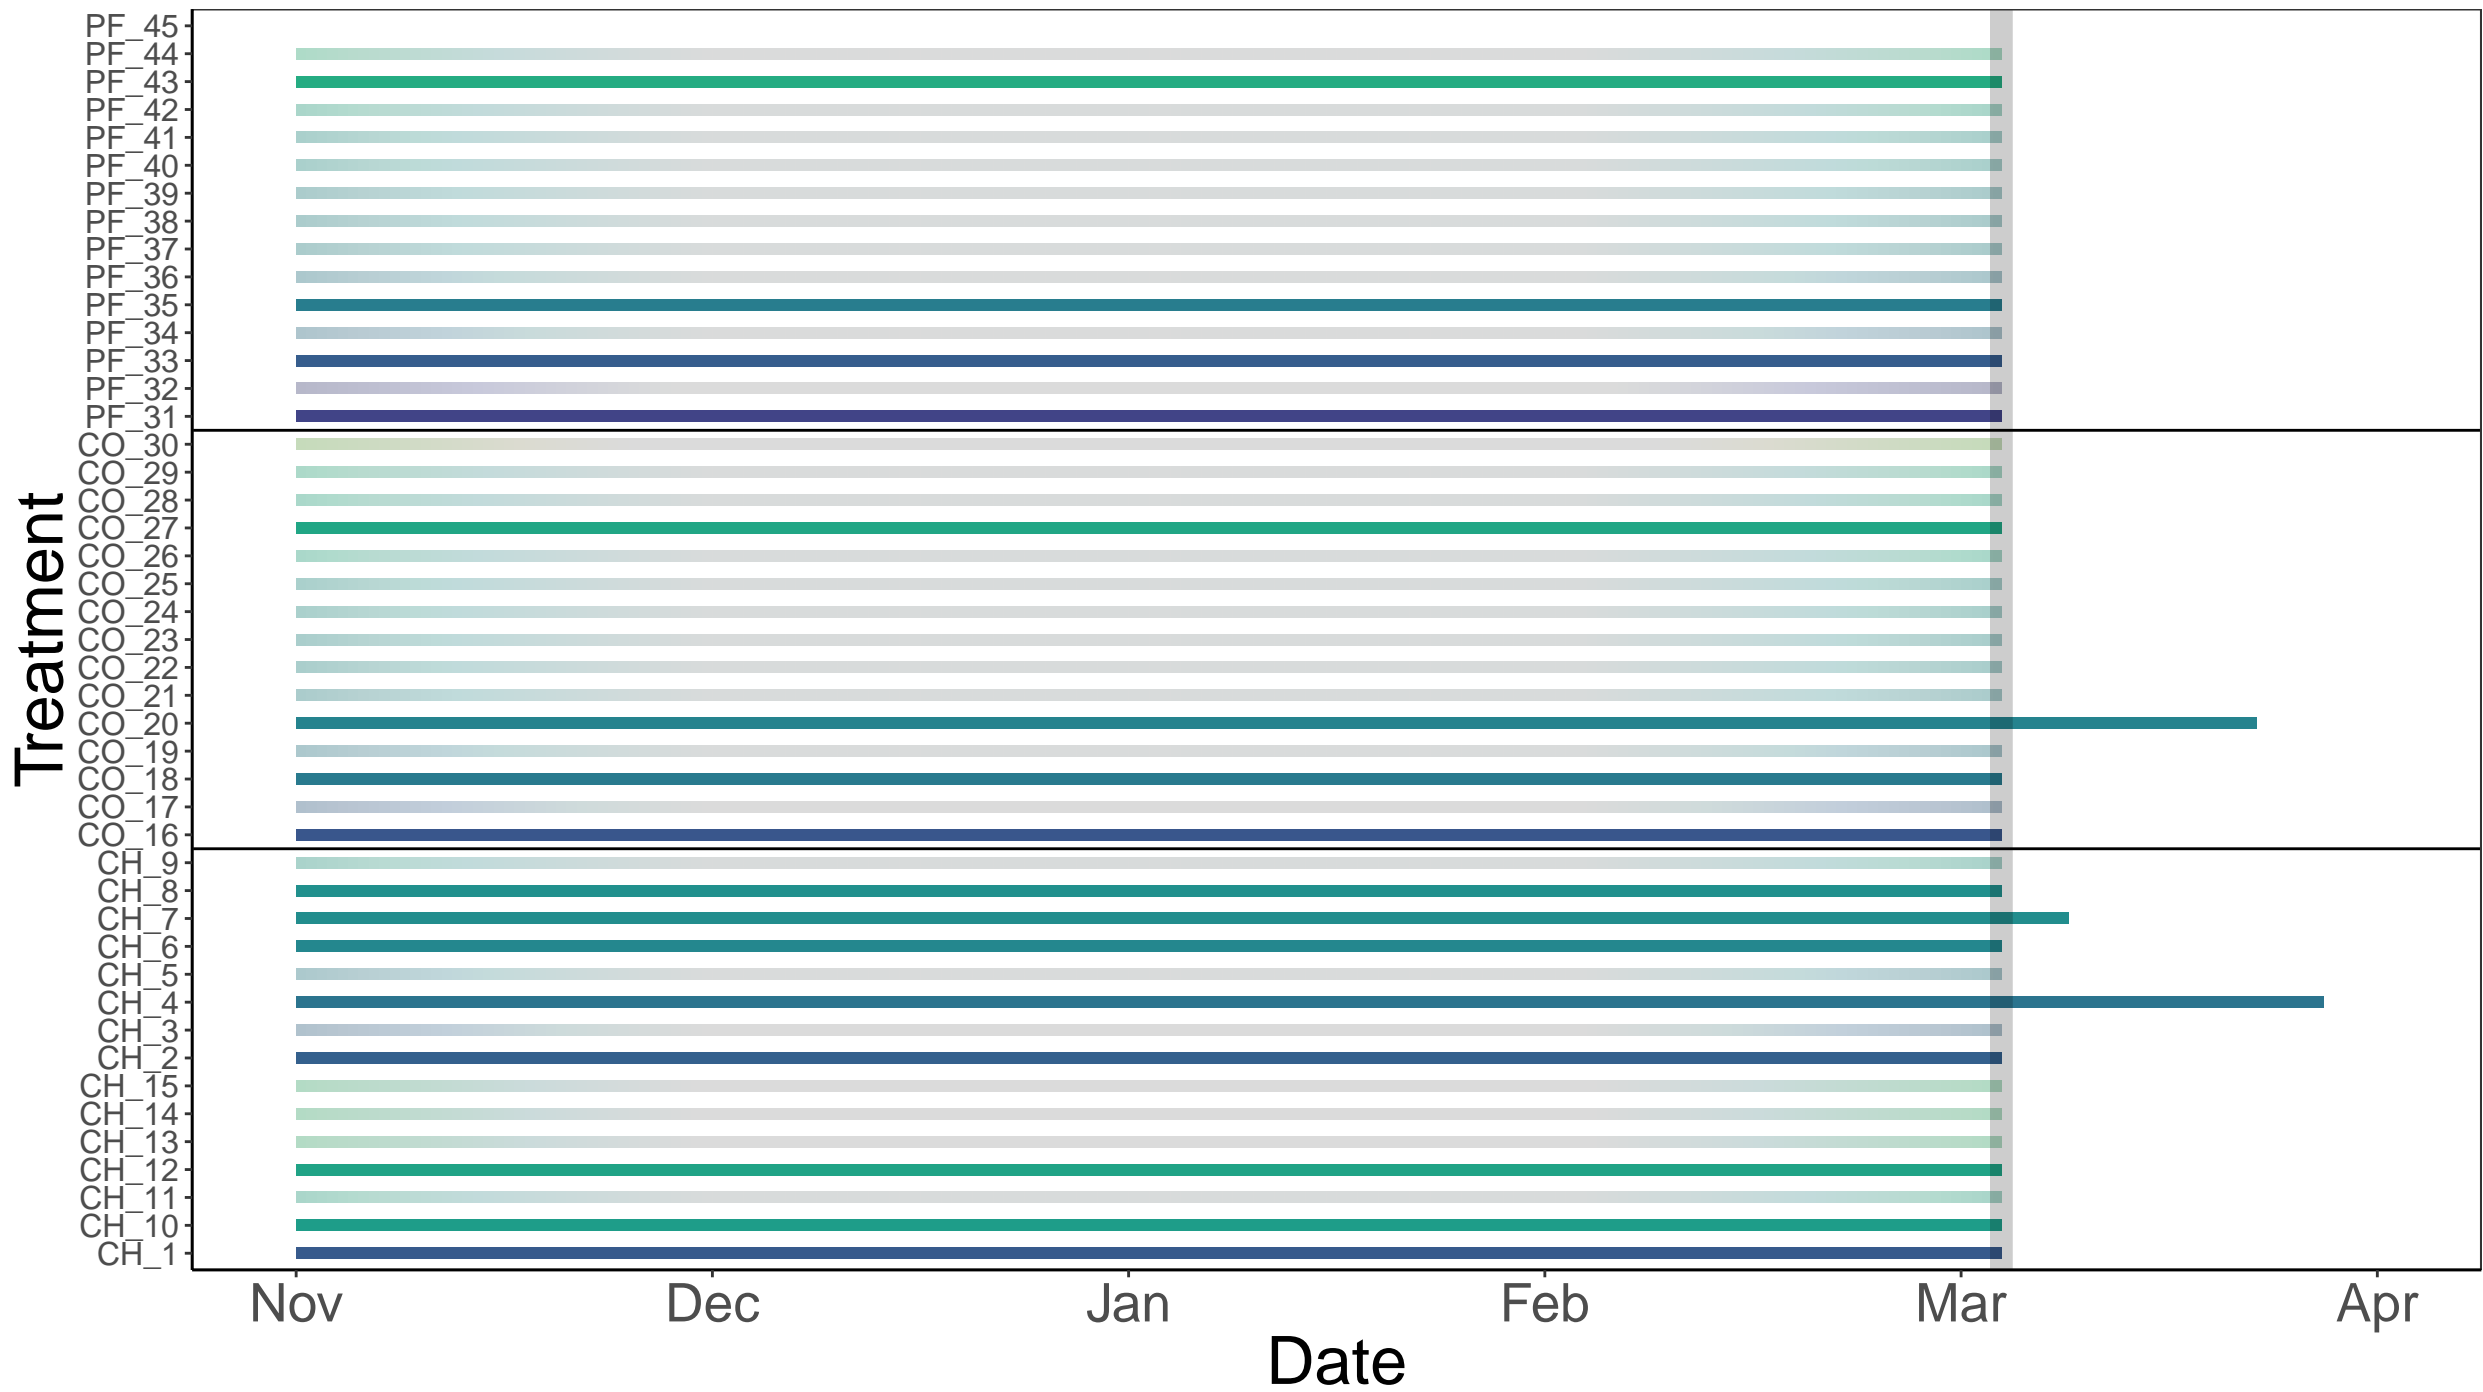



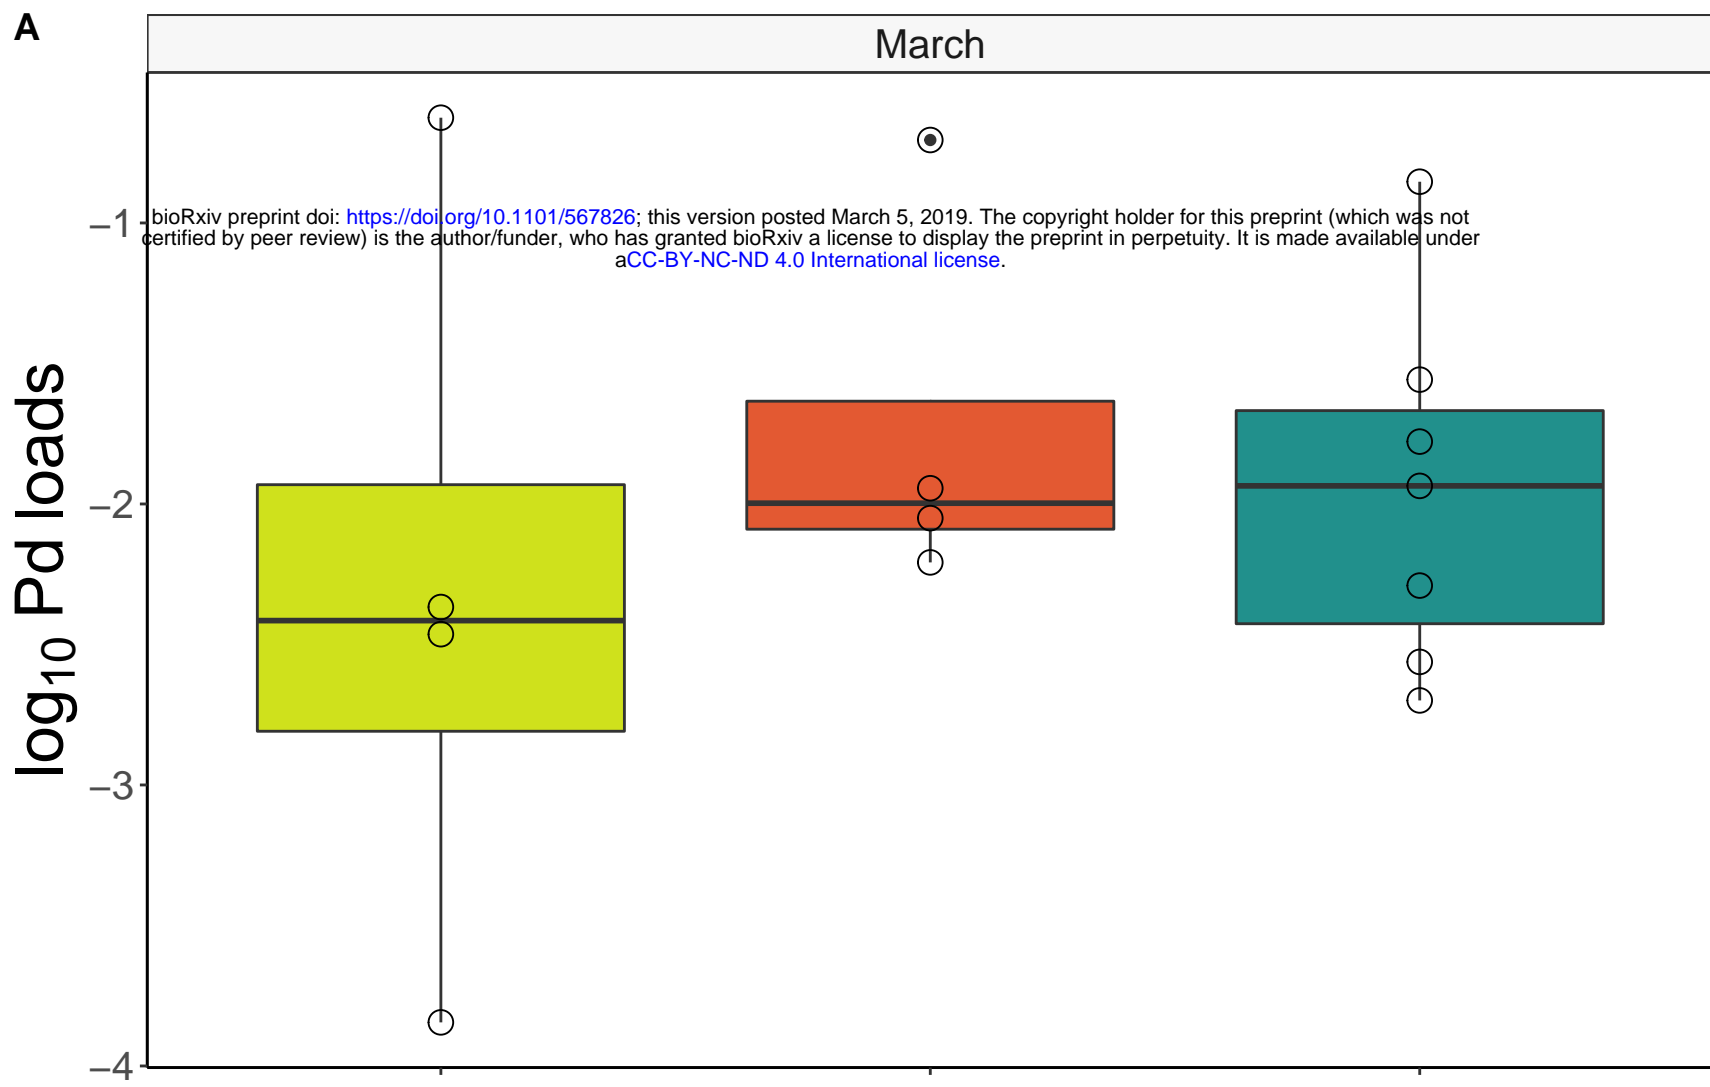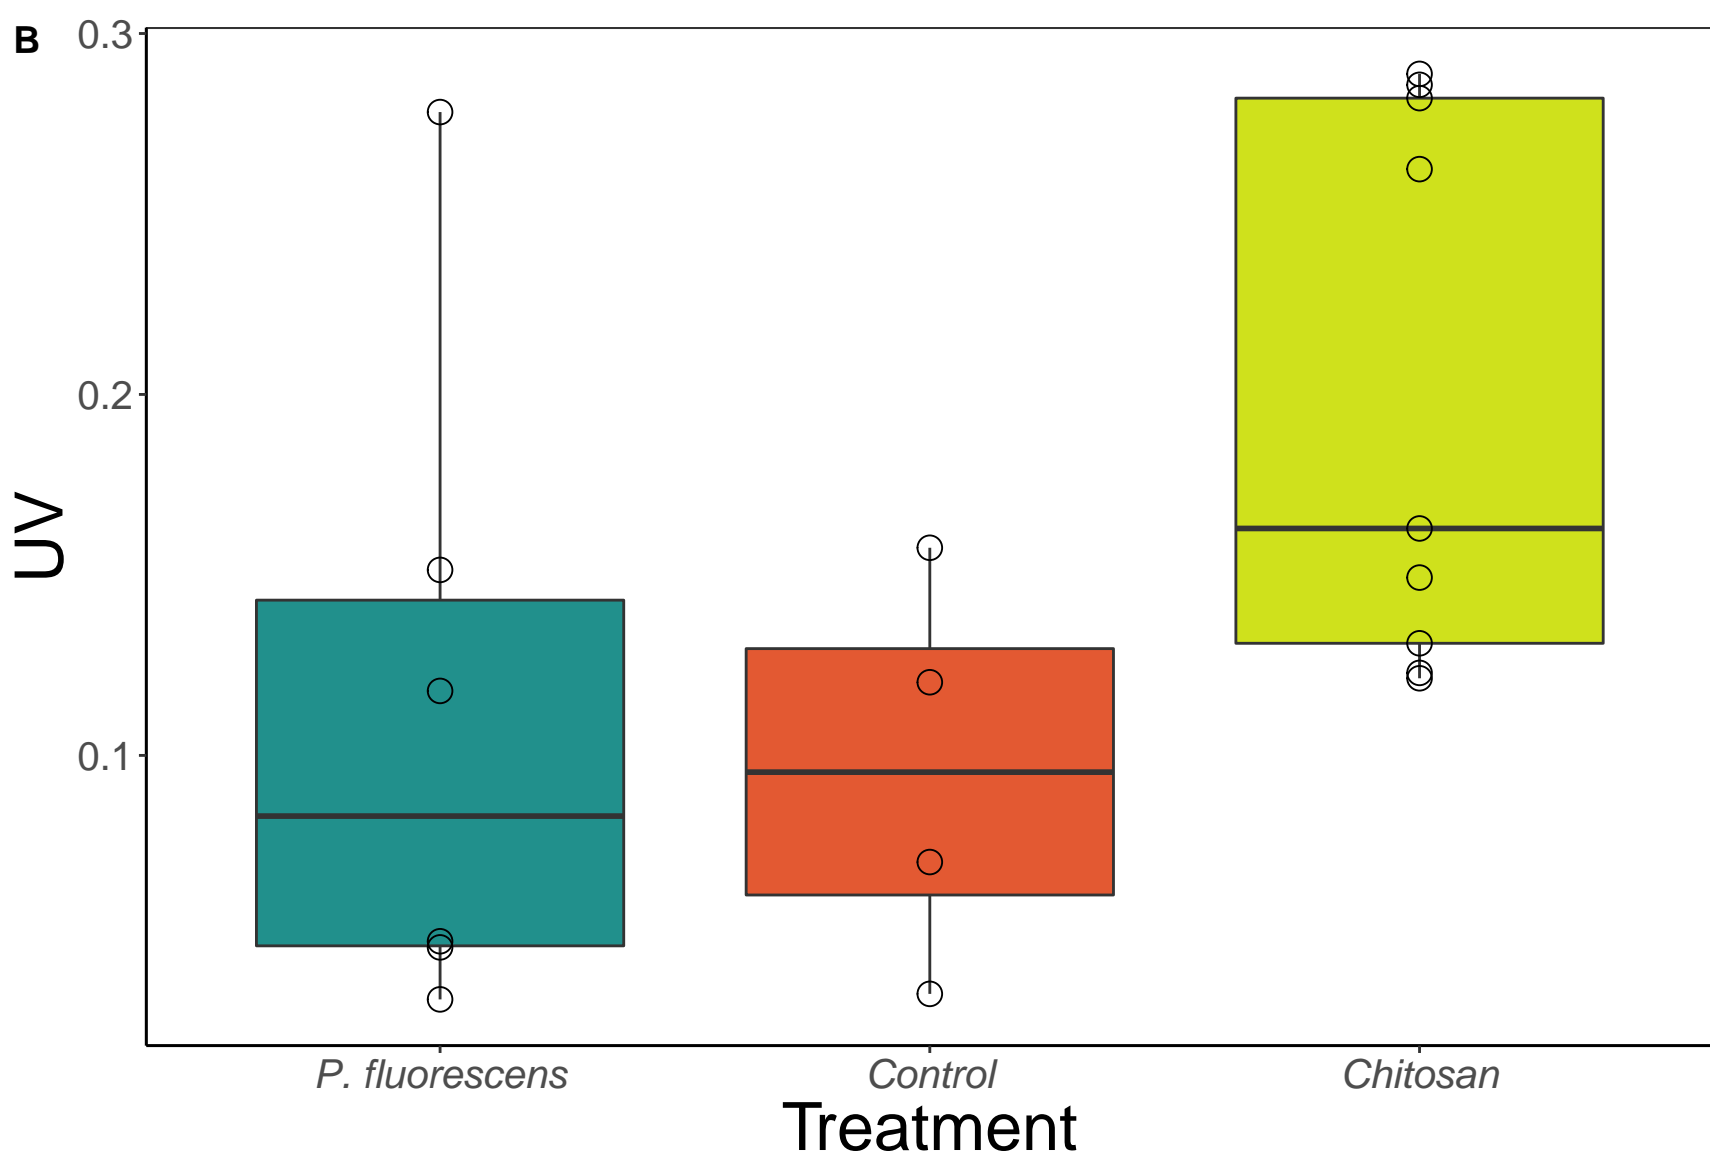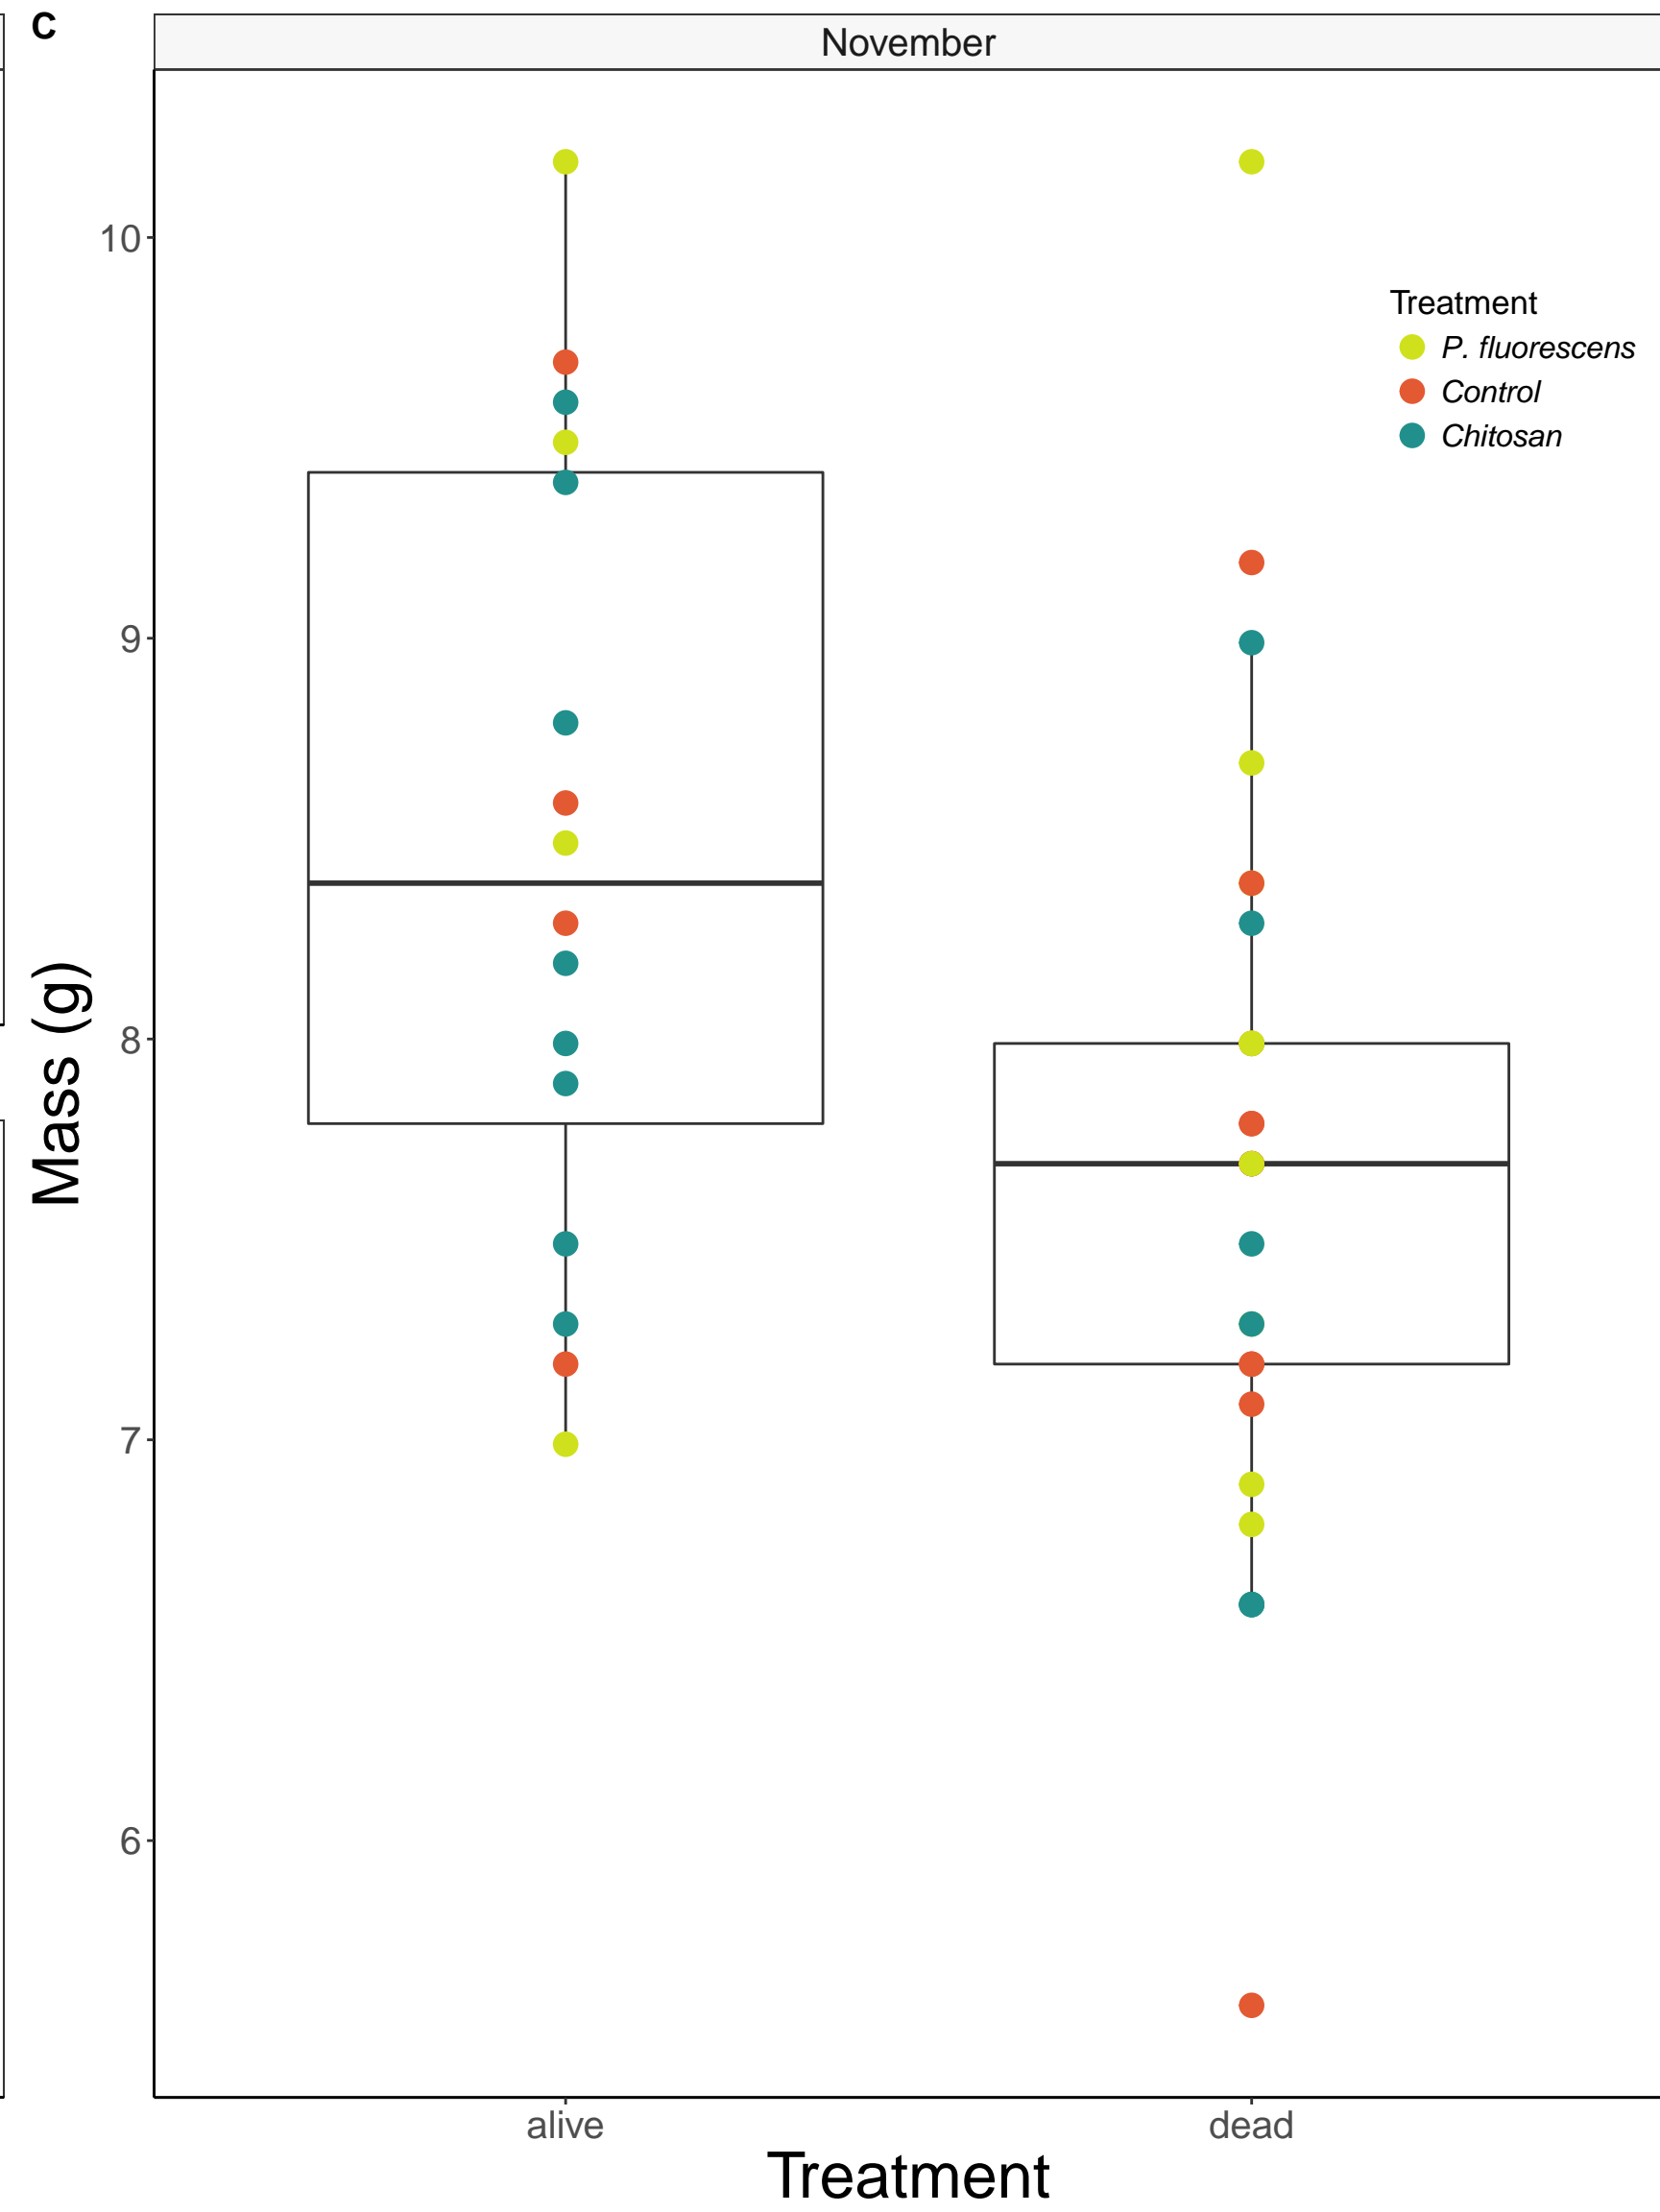

## Field trial of a probiotic bacteria and a chemical, chitosan, to protect bats from white-nose syndrome

Joseph R. Hoyt<sup>1,2,\*</sup>, Kate E. Langwig<sup>1,2</sup>, J. Paul White<sup>3</sup>, Heather M. Kaarakka<sup>3</sup>, Jennifer A. Redell<sup>3</sup>, Katy L. Parise<sup>4,5</sup>, Winifred F. Frick<sup>1,6</sup>, Jeffrey T. Foster<sup>4,5</sup>, A. Marm Kilpatrick<sup>1,\*</sup>

### Supplemental Tables and Figures

**Table S1. Progress on white-nose syndrome treatments.** Bolded references are from published papers and an asterisk (\*) indicates a conference presentation. Full abstracts, titles and author affiliations for the conference presentations can be found at [www.whitenosesyndrome.org/wns-symposia-workshops](http://www.whitenosesyndrome.org/wns-symposia-workshops).

| <b>Treatment agent</b>                     | <b><i>In vitro</i></b> | <b>Lab Trial</b> | <b>Field Trial</b> |
|--------------------------------------------|------------------------|------------------|--------------------|
| Chitosan                                   | 30*                    | 14*              | This study         |
| Polyethelene glycol (PEG)                  | 31*                    | 32*              | 33*                |
| Propolis                                   | <b>34</b>              |                  |                    |
| <i>Pseudomonas fluorescens</i>             | <b>12</b>              | <b>15</b>        | This study         |
| <i>Rhodococcus rhodocrous</i><br>DAP 96253 | 35                     | 36*              | 37*                |
| <i>Trichoderma</i> sp.                     | 38*                    |                  |                    |
| Turbinafine                                | <b>39</b>              | <b>40</b>        |                    |
| Vaccine                                    |                        | 41*              | 42*                |
| Valencia orange oil                        | 43                     |                  |                    |

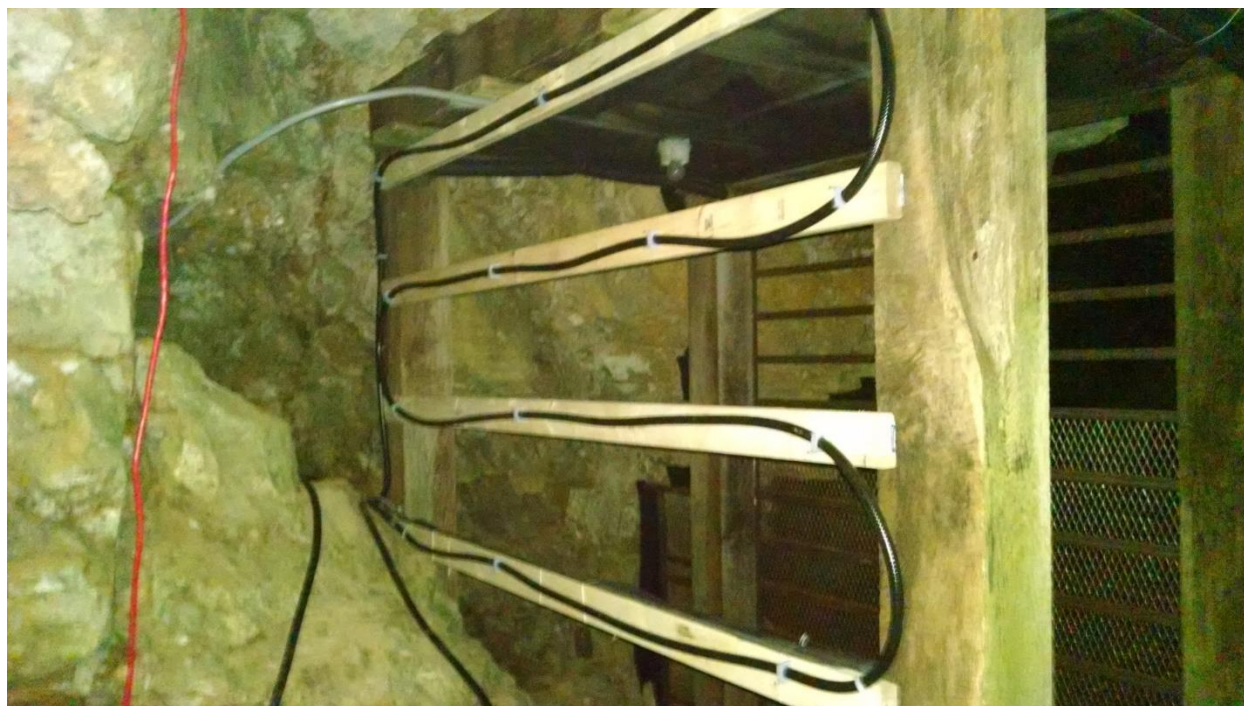

**Figure S1. Photo of PIT tag antennae (black cable) installed at entrance of study site.** The exit of the site is to the right. Shade cloth was used to prevent movement through the exit except between the boards with the attached PIT tag antenna.

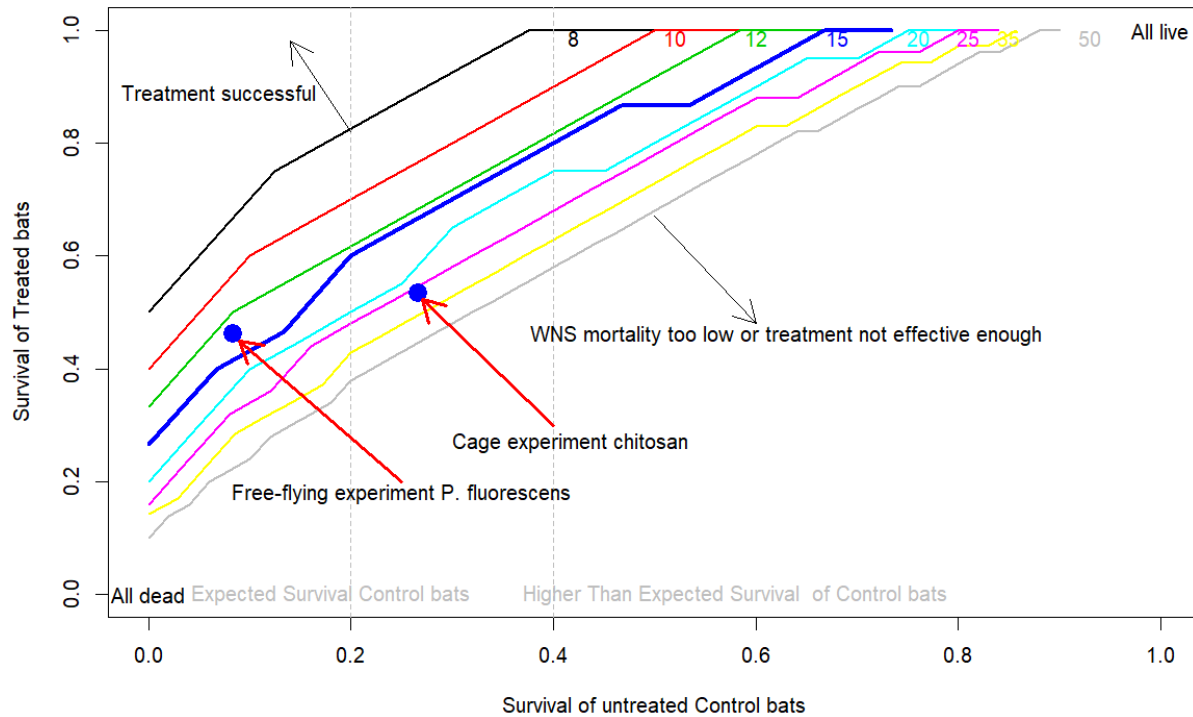

**Figure S2. Power analysis used to design both experiments of the field trial.** The x-axis shows survival of control (untreated bats), the y-axis shows survival of treated bats, and lines with different colors indicate sample sizes of bats in each treatment group that separate significantly different outcomes (above the line) from non-significant differences when results are analyzed with a fisher's exact test. The two blue circles show the outcomes of the two experiments (note that the sample size in the study was ~15 (14-16) – the bold blue line).

## Supplemental Text

### Methods

#### Measurement of fluorescence on bat wings under ultraviolet light

We took pictures of bats wings using a digital camera, approximately 15 cm above the wing under illumination with an UV light. We quantified the fraction of bat's wings (the area of the plagiopatagium proximal to the fifth digit, and below the radius) that fluoresced orange under ultra-violet light using Adobe photoshop, as the number of orange pixels divided by the total number of pixels in the photos of bats' wings.

#### PIT tag attachment to bands

We attached a PIT tag (12mm; Biomark Inc., Boise, ID) to the lip of each aluminum band using super glue (Loctite super glue gel control; Henkel corporation, Rock Hill, CT, USA). The lip of the band was abraded using 100 grit sand paper and the PIT tags were chemically etched using commercially available glass etching cream (Armour etch; Armour products, Hawthorne, NJ, USA) to provide maximum adhesion between the band and the PIT tag. We glued PIT tags to bands rather than gluing them directly to bat's backs to minimize disturbance and time underground (30-60 sec. per bat for glue to dry).

#### Preparation of treatment solutions

The two treatment solutions were prepared ahead of the visit. The *P. fluorescens* solution was prepared by plating bacteria from frozen stock on sabouraud dextrose agar (SDA). Colonies were allowed to grow for one day at room temperature then suspended in a 10X phosphate buffer (PBS) and glycerol solution, by flooding the plate. The solution was homogenized and serial

dilutions were performed using an aliquot of the prepared solution under the same culturing conditions and the remaining liquid was frozen at 20°C. After determining the concentration from the serial dilution plates using colony-forming units (CFU), the remaining frozen liquid was diluted to  $1 \times 10^8$  CFU's. The bacterial solution was shipped overnight on ice and was applied to bats the following day to minimize CFU loss. Chitosan was diluted 1:10 from stock using acetic acid and water.
